RESEARCH ARTICLE

# Development of nanoemulsion formulation loaded with *Enteromorpha intestinalis* extract: Characterization and evaluation for topical use

Shumaila Qadir<sup>1</sup>, Shahlla Imam<sup>1,2\*</sup>, Syed Abid Ali<sup>3</sup>, Fatima Ramzan Ali<sup>4</sup>, Wajiha Iffat<sup>5</sup>, Rabia Ismail Yousuf<sup>6</sup>, Rafia Usman<sup>7</sup>, Shahana Wahid<sup>8</sup>, Iqbal Azhar<sup>1</sup>

**1** Department of Pharmacognosy, Faculty of Pharmacy & Pharmaceutical Sciences, University of Karachi, Karachi, Sindh, Pakistan, **2** Department of Pharmacognosy, Institute of Pharmaceutical Sciences, Jinnah Sindh Medial University, Karachi, Sindh, Pakistan, **3** H.E.J. Research Institute of Chemistry, International Center for Chemical and Biological Sciences (ICCBS), University of Karachi, Karachi, Sindh, Pakistan, **4** Department of Pharmacy, SM Sohail University, Karachi, Pakistan, **5** Department of Pharmaceutics, Dow College of Pharmacy, Dow University of Health Sciences, Karachi, Sindh-Pakistan, **6** Department of Pharmaceutics, Faculty of Pharmacy & Pharmaceutical Sciences, University of Karachi, Karachi, Sindh-Pakistan, **7** Department of Chemistry, NED University of Engineering & Technology, Karachi, Sindh, Pakistan, **8** Department of Pharmacy, Benazir Bhutto Shaheed University, Karachi, Sindh, Pakistan

\* [shahlla.imam@jsmu.edu.pk](mailto:shahlla.imam@jsmu.edu.pk)

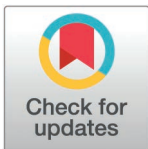

**OPEN ACCESS**

**Citation:** Qadir S, Imam S, Ali SA, Ali FR, Iffat W, Yousuf RI, et al. (2026) Development of nanoemulsion formulation loaded with *Enteromorpha intestinalis* extract: Characterization and evaluation for topical use. PLoS One 21(3): e0343626. <https://doi.org/10.1371/journal.pone.0343626>

**Editor:** Nirav Patel, Strides Pharma Science Limited, UNITED STATES MINOR OUTLYING ISLANDS

**Received:** May 26, 2025

**Accepted:** February 9, 2026

**Published:** March 6, 2026

**Copyright:** © 2026 Qadir et al. This is an open access article distributed under the terms of the [Creative Commons Attribution License](https://creativecommons.org/licenses/by/4.0/), which permits unrestricted use, distribution, and reproduction in any medium, provided the original author and source are credited.

**Data availability statement:** All relevant data are within the manuscript and its [Supporting information](#) files.

**Funding:** The author(s) received no specific funding for this work.

## Abstract

*Enteromorpha intestinalis* is a green seaweed enriched with diverse bioactive compounds that possess substantial pharmacological and biotechnological properties. Despite the focus on their therapeutic applications, research on the development of nano-formulations is limited. Therefore, this study aimed to develop an *E. intestinalis* (EI) extract-based nanoemulsion for topical use. Olive oil, Tween-80 (surfactant), and PEG-400 (co-surfactant) were selected for the formulation of the nanoemulsion. The Smix ratio was set to 1:1 using a pseudo-ternary phase diagram. Moreover, a design experiment ascertained the composition of the formulation, followed by physicochemical characterization. The optimal formulation, based on droplet size, was selected for further analysis. Stability studies, antioxidant and anti-inflammatory properties of selected nanoemulsion formulation were determined and acute dermal toxicity assay was also performed. The best formulation (F6) displayed a droplet size of  $183.27 \pm 20.04$  nm, PDI of 0.6, and viscosity of  $290 \pm 5.77$  m-Pa.S. The developed nanoemulsion exhibited good skin compatibility and a slightly acidic pH. Both the extract and nanoemulsion formulation exhibited concentration-dependent antioxidant activity. The nanoemulsion had a lower  $IC_{50}$  value of  $163.19 \mu\text{g/mL}$ , showing greater efficacy than the seaweed extract alone. Formulation (F6) also significantly ( $p < 0.05$ ) inhibited paw volume (8–31%) compared to the control, while diclofenac sodium achieved a maximum inhibition of 41%. The designed formulation was stable, effective, and non-irritating demonstrating its potential topical application. This study presents, for the first time, a nanoemulsion formulation that incorporates *E. intestinalis*

**Competing interests:** The authors have declared that no competing interests exist.

extract. This advancement paves the way for further *in vivo* studies to assess the efficacy and safety of this formulation for clinical applications.

## Introduction

Nanotechnology is a cutting-edge scientific field that involves the development of materials and devices at the nanoscale, with tailored properties for diverse applications [1]. Nanomaterials, including nanomedicine, nano-pharmaceuticals, theranostics, and nano-imaging agents, have revolutionized disease diagnosis, prevention, and management strategies. Nanomedicine-based formulations offer several advantages, for instance, targeted drug delivery, enhanced efficacy, reduced toxicity, improved patient compliance, and favorable clinical outcomes, making them promising candidates for treating complex diseases like cancer. Their distinctive nanoscale dimensions and extensive surface area to volume ratio give more active sites, which facilitate precise interactions within the cells and tissues. To date, approximately 100 nanomedicine formulations have received approval from the European Medicines Agency (EMA) and the United States Food and Drug Administration (FDA), and the field is poised for further advancement. Nanomedicines, including Lipid-and polymer-based formulations, nano-crystals, inorganic nanoparticles, and protein-based nanoparticles, are currently commercially available [2]. In recent years, nano-formulations, particularly nanoemulsions (NEs), have gained considerable interest in various scientific fields. NEs are classified into four major categories: O/W (Oil-in- Water), W/O (Water-in-Oil), O/W/O (Oil-in-Water-in-Oil), and W/O/ W (Water-in-Oil-in-Water), based on the pattern of dispersion of the oil and water phase [3]. The small droplet size of nanoemulsions ranges from 20-500 nm, providing greater surface area, long-term stability, better penetration, and enhance biological activity of the bioactive compounds. Therefore, finds applications in various domains, such as pharmaceuticals, cosmetics, personal care formulations, transdermal, vaccines, cell culture, cancer therapy, and in drug delivery systems [4–6].

Seaweed is a versatile natural resource that is gaining recognition as a promising material for developing safe, effective, and cost-efficient formulations [7]. Seaweed-based cosmetics have gained popularity as natural alternatives to synthetic products. The bioactive compounds in seaweed provide numerous skin care benefits, including antioxidant, antibacterial, and anti-aging properties [8]. Their diverse functional, sensorial, and biological properties make them ideal ingredients for developing innovative and effective cosmetic formulations. Many cosmetic companies are now incorporating seaweed extracts into their formulations as active agents, excipients, pigments, preservatives, additives, and fragrance agents. Seaweeds contain several bioactive compounds, primarily polysaccharides, along with polyphenolics, natural pigments, amino acids, proteins, peptides, polyunsaturated fatty acids, sterols, minerals, and vitamins. These bioactive compounds exhibit a wide range of bioactivities, making them suitable as active components in topical formulations. For instance, Gracilaria extracts are used in various commercial cosmetics, such as hydrogel soap, facial masks, and hydrating creams, while mycosporine-like amino acids are

incorporated into various sunscreen products. Seaweed-based ingredients are available in various forms including creams, hydrogels, soaps, shampoos, and sprays. Their effectiveness and stability can be enhanced using nanocarrier systems, such as nanoparticles, nanoemulsions, nanohydrogels, and liposomes, which facilitate the delivery of active agents for optimized effects [9,10].

Numerous seaweed species have been identified and characterized, yet several varieties widely disseminated along Karachi's coastline remain underexplored. *Enteromorpha intestinalis*, formerly known as *Ulva intestinalis* (family: Ulvaceae), is one of the most abundant algal species found in coastal regions, such as Buleji, Korangi Creek, Manora, and Sandspit in Karachi, Pakistan [11]. *Enteromorpha intestinalis* is enriched with bioactive compounds, such as phenolics and flavonoids, which are potentially active against free radicals [12]. Though the extensive application of seaweed extracts in various fields has been established, their use in the development of nanoemulsions has been limited. Therefore, the present study aimed to develop a nanoemulsion formulation incorporating *Enteromorpha intestinalis* extract for topical delivery, which may offer potential benefits for both the cosmeceutical and pharmaceutical industries.

## Materials and methods

### Materials

Olive oil (Sasso, Italy) and virgin coconut oil were procured from a local supplier in Karachi, Pakistan. Ascorbic acid, DPPH (2, 2-diphenyl-1-picrylhydrazyl), ferric chloride, potassium ferricyanide, trichloroacetic acid, Tween 80, and PEG 400 were obtained from Sigma-Aldrich Co. (St. Louis, USA). While ethanol was purchased from Merck (Germany). A commercially available diclofenac sodium gel (2%) was obtained from a local pharmacy in Karachi, Pakistan. Analytical grade reagents and chemicals were utilized in this study.

### Seaweed material

*Enteromorpha intestinalis* was collected from the coastal area of Buleji, Karachi, Pakistan. Professor Dr. Mohtasheemul Hassan, from the Department of Pharmacognosy, Faculty of Pharmacy and Pharmaceutical Sciences, University of Karachi, Pakistan, authenticated the algal sample with the herbarium code EI-03–20.

### Preparation of *Enteromorpha intestinalis* extract

The seaweed was thoroughly washed several times with distilled water to eliminate impurities and unwanted debris. The sample was dried under shade and then ground into a fine powder. Approximately 500 g of powdered seaweed was macerated with ethanol (95%). The mixture was shaken manually every 12 hours for 7–10 days at room temperature [13]. After filtration, the algal material was concentrated in a rotary vacuum evaporator under reduced pressure. The algal extract was packed in a glass bottle and positioned in a refrigerator at 4 °C for subsequent analysis.

### GC–MS (Gas chromatography–mass spectrometry) analysis of *E. intestinalis* extract

To identify the bioactive compounds in *E. intestinalis* extract, GC-MS analysis was performed as described by [12,14], with minor modifications to suit our specific sample matrix and equipment setup. For Chromatographic separation, a capillary column ZB-5 (30 m × 0.32 mm × 0.25 μm film thickness) and a SHIMADZU Nexis series GC-MS-TQ8040 NX System, including an auto sampler AOC-20i and a gas chromatograph GC-2030 coupled with triple Quad pole mass spectrometer, were used. Helium gas served as the carrier gas, with a flow rate of 1 mL/min, and a sample with a volume of 1 μL was injected. The oven temperature was initially set to 50 °C for 5 min and then increased to 200 °C at a rate of 5 °C/min over 10 min. Subsequently, the temperature rose to 300 °C at a rate of 8 °C/min, which also lasted for 10 min. The total runtime for this process was 51 minutes. The temperature of the mass spectrometer's transfer line was adjusted to 260 °C, and the injector was maintained at 250 °C. The solvent cut time before injection was 3 min. The Electron ionization (EI) system

of the mass spectrometer was operated in full scan mode with an ionization energy of 70 eV, including fragments ranging from 20–600 *m/z*. The ion-source temperature was set to a constant value of 200 °C. The GCMS real-time analysis software database of the National Institute of Standards and Technology (NIST) was used to identify the compounds.

## Nanoemulsion formulation

### Screening of nanoemulsion components

To determine the maximum solubility of the *E. intestinalis* extract in oil, two commonly used vegetable oils, virgin coconut oil and olive oil, were evaluated [15–17]. A variable amount of EI extract was added to 5 mL of the oil, followed by sonication (E 30H, Elmasonic, Germany) for 15 minutes at 37 °C. The resultant mixture was then homogenized for an additional hour on a magnetic stirrer. Subsequently, the mixture was thoroughly mixed utilizing a vortex mixer (Whirl Mixer Lab, FSA Supplier, England) for 5 minutes, followed by centrifugation (Heraeus Biofuge Primo R Centrifuge, Thermo Electron Corporation) at 4000 rpm for 15 minutes. After that, the solution was visually observed to identify the residues [16,18]. The entire procedure was performed repeatedly, and the amount of extract in the oil was gradually increased (up to 1%, w/v), to identify the maximum concentration at which the oil could dissolve the extract. At 0.2% concentration, solubility increased significantly; however, exceeding this concentration resulted in a noticeable rise in residue formation, indicating that the solubilizing limit had been reached. The oil displaying the highest capacity to dissolve the algal extract was chosen [16]. Moreover, a UV spectrophotometer (Perkin Elmer SP-UV-500 Series UV-Vis Spectrophotometer) was utilized to evaluate the solubility of the extract in the aforementioned oils. The absorbance was noted at various wavelengths varied between 400 and 800 nm [17,19]. Tween 80 and PEG 400 were selected as surfactants and co-surfactants due to their low toxicity, biocompatibility, and extensive use in pharmaceutical formulations [3].

**Pseudoternary phase diagram.** To delineate suitable formulation ranges, tween 80, PEG 400, and olive oil were chosen to construct a pseudo-ternary phase diagram utilizing the water titration method [20,21]. Various weight ratios of the surfactant and co-surfactant were mixed at 3:1, 2:1, and 1:1 to develop the optimal nanoemulsion formulations. Each Smix was then mixed with olive oil as the oil phase (weight ratio of 1:9–9:1). The oil and surfactant mixture was gradually diluted with distilled water (aqueous phase) while stirring constantly until equilibrium was achieved. The resultant sample was then observed visually to categorize as nanoemulsion, gel, or emulsion. The CHEMIX ternary plot software (Chemix School 9) was employed to construct the phase diagrams.

**Formulation of *E. intestinalis* extract loaded-nanoemulsion.** According to the pseudo-ternary phase diagrams, the largest area (1:1 Smix) was selected for the formulation development. Furthermore, a Simplex lattice design experiment (Design Expert software Version 7.0) was employed to generate different compositions of nanoemulsion formulations [22]. In the low-energy method, spontaneous emulsification was used to prepare an *E. intestinalis* extract-loaded nanoemulsion. Under continual stirring, the aqueous phase was introduced drop wise into the oil phase, containing *E. intestinalis* extract (0.2%) and surfactant and co-surfactant mixture, previously homogenized for 5 minutes at room temperature utilizing a magnetic stirrer [21,23,24]. The resultant mixture was stirred for 1 hour until a clear, transparent, and equilibrium state (stable state) was attained. The NE formulation was set aside in a refrigerator at 4 °C in a well-closed glass container till further use.

### Characterization of Nanoemulsions

**Droplet size and Polydispersity Index (PDI).** Particle size and polydispersity index (PDI) of the nanoemulsion formulations were determined utilizing the DLS (Dynamic Light Scattering) technique (Laser spectroscatter-201, Xtal Concepts, Germany). The analysis (*n* = 50) was executed at 25 ± 1 °C with a fixed scattering angle of 90°. Before analysis, the sample was diluted 1:10 with deionized water to minimize the likelihood of light scattering. For the data analysis, Xtal Concepts software (Xtal Concepts, Germany) was utilized [25,26].

**pH determination.** The nanoemulsion formulation (1 g) was diluted with distilled water (10 mL). The pH of the resultant solution was noted at room temperature ( $25 \pm 2$  °C) with a pH meter (Mettler MP-220, Schwerzenbach, Switzerland), [20]. Before the measurements, the pH meter was calibrated using standard buffer solutions with pH values of 4.0, 7.0, and 10.0 to ensure the accuracy and reproducibility of the obtained data [16]. Each measurement was performed in triplicate.

**Refractive index measurement.** The refractive index of the designed nanoemulsion was determined via an Abbe's refractometer (Schmidt Haensch-24298, Germany). A small amount of the NE sample was introduced on the instrument's glass slide, and the corresponding scale reading was recorded. Prior to the measurements, the instrument was initially calibrated with distilled water [27].

**Viscosity determination.** A Brookfield viscometer (Haake-19, Karlsruhe, Spain) equipped with an L3 spindle was utilized to assess the viscosity of the nanoemulsion. The spindle speed was set to 60 rpm. Triplicate measurements were taken at a constant temperature ( $25 \pm 2$  °C) [28,29].

**Conductivity measurement.** The conductivity of the nanoemulsion formulation was measured at room temperature ( $25 \pm 2$  °C) via a Conductometer (WPA-CMD-500, Cambridge, UK), [16,27].

### Model fitting and optimization

The developed nanoemulsion formulations were analyzed using a simplex lattice design experiment (Design Expert software Version 7.0), with the aim to determine the effects of oil, Smix, and water percentages on droplet size, PDI, and viscosity. The design utilized the component ranges identified from the pseudo-ternary phase diagram: oil (5–15%), surfactant and co-surfactant mixture (Smix; 65–75%), and water (10–20%). A total of seven formulations were generated. Specific quantities of each ingredient were utilized to achieve a minimum droplet size, acceptable polydispersity index, and optimal viscosity. The independent variables were oil (X1), Smix (X2), and water (X3), while the dependent response variables were droplet size (Y1), polydispersity index (Y2), and viscosity (Y3). A quadratic model was employed for droplet size and PDI, whereas a linear model was used for viscosity. One-way ANOVA (analysis of variance) and the coefficient of determination ( $R^2$ ) were employed to evaluate the correlations between the independent and the response variables. A statistically significant  $p$ -value  $< 0.05$  and a high  $R^2$  ( $> 0.9$ ) value indicate a strong, well-fitting model. Response surface curves were plotted to visualize the impact of these variables on the dependent responses [24,30]. Based on the response variables, the optimal formulation was chosen for further studies.

### Stability studies of nanoemulsion

Stability studies of the chosen nanoemulsion were performed at various time points, such as 0 months (fresh state), followed by 1, 2, and 3-months at  $4 \pm 2$  °C, and  $25 \pm 2$  °C. The physical appearance (phase separation, color change, clarity, and texture) and pH were evaluated. Furthermore, droplet size and polydispersity index were assessed at the fresh state, 48 hours, 15 days, and 3-month intervals [16,21,31].

### Extract-exipients interaction studies

Fourier Transform Infrared Spectroscopy (FT-IR) was employed to investigate the potential interactions between the components of the nanoemulsion and the extract. Approximately 20 mg of each sample (extract, olive oil, Tween 80, PEG 400, and nanoemulsion) was analyzed using an FT-IR Spectrophotometer (Nicolet Avatar 330; Thermo Electron Co., USA) equipped with a diamond attenuated total reflectance (ATR) accessory. The spectra were noted within a wave number range between  $4000$ – $400$   $\text{cm}^{-1}$  [17].

### Spreadability

The "Drag & Slip" method, with slight modifications, was employed for the evaluation of the spreadability of *E. intestinalis*-loaded nanoemulsion [32]. Two glass slides (each 7.5 cm long) were positioned parallel to one another. One slide was

set as movable while the other one was in a fixed position. The fixed glass slide was connected to a pulley system, and around 1 g of nanoemulsion was placed between the slides. A 500 g weight was put on the slide for 5 minutes, followed by a 50 g weight connected to the movable side via a string that ran over the pulley. The time taken for the movable slide to be pulled off was noted. The below-mentioned equation was employed to determine the spreadability of nanoemulsion formulation, where S represents the spreadability of the designed formulation, M is the weight (g), while L indicates the length of the upper slide (cm), and T denotes the time (sec) taken to separate the two glass slides from each other.

$$S = M \times L/T \quad (1)$$

### Antioxidant activity

**DPPH free radical scavenging assay.** The free radical scavenging activity was evaluated using a slightly modified DPPH assay [28]. Approximately 2 ml of 2, 2-diphenyl-1-picrylhydrazyl (DPPH; 0.1 mM) solution mixed with 2 mL of varying concentration (50–800 µg/mL) of the *E. intestinalis* extract and nanoemulsion formulation (F6). Subsequently, the mixture was incubated in a dark chamber at room temperature for 20 minutes. The absorbance of each reaction mixture was then noted at 517 nm using a UV-Vis spectrophotometer. Ascorbic acid was used as a positive control (5–40 µg/mL). The equation indicated below was employed to determine the percentage inhibition, where Ac denotes the absorbance of the control and As represents the absorbance of the sample. Linear regression analysis was employed to determine the IC<sub>50</sub> value.

$$\text{Percentage inhibition} = [(Ac - As) / Ac] \times 100 \quad (2)$$

**Ferric Reducing Power assay.** The ferric-reducing antioxidant power (FRAP) was performed as outlined in a previous study [33]. Aliquots of extract and nanoemulsion formulation (F6), ranging in concentration from 200–3200 µg/mL, were mixed with equal volumes (2.5 mL) of potassium ferricyanide (1%) and phosphate buffer (pH 6.6, 0.2 M). The resultant mixture was then incubated at 50 °C for 20 minutes. Subsequently, 2.5 mL of 10% (w/v) trichloroacetic acid solution was introduced into the mixture, followed by centrifugation for 10 minutes. The supernatant (2.5 mL) was mixed with distilled water (2.5 mL) and 0.1% ferric chloride solution (0.5 mL). The absorbance was recorded at 700 nm against a blank solution. The results were presented as a percentage of 0.02 mg/mL of ascorbic acid, which served as a reference standard [34].

### Anti-inflammatory activity

**Animals.** Healthy male Albino Wistar rats (150–250 g) were obtained from the animal house of the Department of Pharmacology, Faculty of Pharmacy and Pharmaceutical Sciences, University of Karachi, Pakistan. The animals were housed in a controlled environment with a temperature of 22 ± 2 °C, relative humidity of 50–60 ± 0.2%, and a 12-hour light/dark cycle. Standard diet and water were provided to the rats *ad libitum*. Before the study, the experimental animals were acclimatized to the laboratory conditions for a week. All experimental procedures adhered to the Good Laboratory Practice (GLP) guidelines and followed ethical protocols for animal care. The Institutional Bioethical Committee, University of Karachi, Karachi, Pakistan, approved this research study (approval No. IBCKU-141/2020/24).

**Carrageenan-Induced acute inflammation Model.** Anti-inflammatory activity was evaluated using a carrageenan-induced rat paw edema model, as previously described [35,36]. Animals were separated into three groups (n=6). Group I served as the control (untreated), Group II was treated with a commercially available Diclofenac Sodium gel (2%), and Group III was treated with a nanoemulsion formulation. Before administering the carrageenan injection, the nanoemulsion formulation and diclofenac sodium gel (approximately 200 mg) were topically applied to the plantar surface of the right

hind paw with gentle rubbing. Thirty minutes following the topical application, a carrageenan solution (0.1 mL, 1% w/v) was injected into the sub-plantar site of the right hind paw of each rat. Paw edema volume was measured at 30 minutes and 1, 2, 3, and 4 hours of post-carrageenan injection, using a plethysmometer (Ugo Basile 7140 Comerio, Italy) [37]. The initial paw volume (baseline) was noted for all animals before inducing inflammation. The percentage inhibition was determined using the equation given below, where  $V_t$  indicates the paw volume of the test group, and  $V_c$  denotes the paw volume of the control group [38].

$$\% \text{ inhibition} = 100 \times (1 - V_t/V_c) \quad (3)$$

### Acute dermal toxicity

An acute dermal irritation study was executed on Wistar Albino rats (150–250 g). The rats' dorsal skin was shaved 24 hours prior to treatment application. Animals were separated into three groups ( $n=6$ ). Group I served as the control (untreated), while Group II received a commercially available 2% diclofenac gel. Group III was treated with algal extract-loaded nanoemulsion. Notably, all treatment groups (II and III) received approximately 200 mg of their respective formulations. After a 24-hour application period, the rats' skin was examined for signs of rash, edema, and erythema using a 4-point severity scale (4; scar formation, 3; moderate redness/swelling, 2; well-defined redness/ swelling, 1; slight redness/swelling, and 0; no signs). The Primary irritability Index (PII) was calculated based on Draize dermal scores [17,39,40]. Data were analyzed to compare skin irritation between the experimental groups.

### Statistical analysis

The results were presented as mean  $\pm$  SEM (Standard Error Mean). A Paired 't'-test ( $P<0.05$ ) was executed to assess the antioxidant activity. For the anti-inflammatory assay, one-way analysis of variance (ANOVA) followed by Dunnett's post-hoc test ( $P<0.05$ ) was applied to determine the differences among the experimental groups. SPSS (Statistical Package for the Social Sciences, Inc., Corporation, Chicago, IL, USA) software version 27 was used for the data analysis.

## Results and discussion

### *E. intestinalis* extract and GC–MS analysis

The extraction of bioactive metabolites, including polyphenolics, carotenoids, flavonoids, saponins, minerals, and vitamins, poses several challenges owing to their complex nature. Several factors, such as solvent choice, temperature, pH, and extraction conditions, significantly influence the yield of crude extracts [41]. In this study, the yield of *E. intestinalis* extract was found to be 15.96%, which closely aligns with the previously reported yield of the ethanolic extract, documented as  $13.4 \pm 0.51\%$  [42]. The GC–MS profile of *E. intestinalis* extract revealed a total of 28 major bioactive compounds (Table 1). These substances fall under different chemical classes, including hydrocarbons, hydrocarbon alcohols, phenols, sterols, terpenoids, and both saturated and unsaturated fatty acid esters. The majority of these compounds are said to have substantial biological activities. One of the key advantages of employing GC-MS is its exceptional precision in identifying derivatized compounds that are abundant in the sample [14]. The identified hydrocarbons were hexadecane, n-heptadecane, 1-heptacosene, n-nonadecane, neophytadiene, 2-methyltetracosane, eicosane, and heneicosane. The fatty acid ester profile comprised saturated fatty acid esters, such as stearic acid, methyl ester; palmitic acid, ethyl ester; pentadecanoic acid, methyl ester, and tridecanoic acid, 12-methyl-, methyl ester, along with unsaturated fatty acid esters, including palmitoleic acid, methyl ester; oleic acid, methyl ester; elaidic acid, methyl ester; and oleic acid, eicosyl ester. The extract also contained phenol (2, 4- di-tert-butylphenol), alcohols (n-heptadecanol-1, n-nonadecanol-1, 3, 7, 11-Trimethyl-1-dodecanol), sterols (cholesta-4, 6-dien-3-ol, stigmasterol acetate), and derivatives of TMS (Isofucosterol, o-TMS). Additionally, terpenoids were present, including monoterpene lactone (Loliolide), diterpene alcohols (phytol, trans-phytol, 3, 7,

**Table 1. *E. intestinalis* extract GCMS Peak Report TIC.**

| Peak# | R. Time | Area       | Area % | Compound Name                              |
|-------|---------|------------|--------|--------------------------------------------|
| 1     | 25.572  | 2810229    | 0.08   | 2,4-Di-tert-butylphenol                    |
| 2     | 26.544  | 7381695    | 0.21   | Phytol                                     |
| 3     | 27.013  | 76449551   | 2.15   | Hexadecane                                 |
| 4     | 27.644  | 16911841   | 0.47   | 3,7,11-Trimethyl-1-dodecanol               |
| 5     | 28.251  | 435243089  | 12.22  | n-Heptadecanol-1                           |
| 6     | 28.324  | 45264265   | 1.27   | n-Nonadecanol-1                            |
| 7     | 28.547  | 70118217   | 1.97   | n-Heptadecane                              |
| 8     | 28.927  | 52015733   | 1.46   | Tridecanoic acid, 12-methyl-, methyl ester |
| 9     | 29.055  | 17065166   | 0.48   | 1-Heptacosene                              |
| 10    | 29.837  | 72069853   | 2.02   | Loliolide                                  |
| 11    | 29.997  | 112996253  | 3.17   | n-Nonadecane                               |
| 12    | 30.358  | 11432887   | 0.32   | Pentadecanoic acid, methyl ester           |
| 13    | 30.849  | 385536872  | 10.82  | 3,7,11,15-Tetramethyl-2-hexadecen-1-ol     |
| 14    | 31.111  | 689422525  | 19.35  | Neophytadiene                              |
| 15    | 31.396  | 29836499   | 0.84   | 2-Methyltetracosane                        |
| 16    | 31.457  | 50077423   | 1.41   | Palmitoleic acid, methyl ester             |
| 17    | 31.582  | 149950351  | 4.21   | Hexahydrofarnesyl acetone                  |
| 18    | 32.005  | 93432663   | 2.62   | trans-Phytol                               |
| 19    | 32.616  | 39769018   | 1.12   | Palmitic acid, ethyl ester                 |
| 20    | 32.694  | 100284836  | 2.82   | Eicosane                                   |
| 21    | 33.980  | 46180906   | 1.30   | Elaidic acid, methyl ester                 |
| 22    | 34.097  | 689814803  | 19.36  | Oleic acid, methyl ester                   |
| 23    | 34.283  | 21146794   | 0.59   | Stearic acid, methyl ester                 |
| 24    | 34.855  | 38486687   | 1.08   | Oleic acid, eicosyl ester                  |
| 25    | 35.147  | 43279263   | 1.21   | Heneicosane                                |
| 26    | 44.736  | 33361975   | 0.94   | Stigmasterol acetate                       |
| 27    | 44.956  | 175423475  | 4.92   | Cholesta-4,6-dien-3-ol                     |
| 28    | 45.266  | 56443837   | 1.58   | Isofucosterol, O-TMS                       |
|       |         | 3562206706 | 100.00 |                                            |

<https://doi.org/10.1371/journal.pone.0343626.t001>

11, 15-Tetramethyl 1–2-hexadecen-1-ol), and a sesquiterpene ketone (hexahydrofarnesyl acetone). These findings are aligned with those of previous studies [12,14]. Notably, these metabolites are recognized for their diverse biological activities, including antioxidant, antimicrobial, cancer-preventive, and hyper-cholesterolemic properties [12]. The GCMS spectra of *E. intestinalis* extract are displayed in Fig 1.

### Screening of nanoemulsion components

Nanotechnology has been extensively used in the pharmaceutical and cosmeceutical industries owing to its distinctive properties and exceptional ability to enhance the absorption of bioactive compounds. To achieve optimal nanoemulsions with desired properties, such as small droplet size, low polydispersity index (PDI), stability, and specific functionalities, various formulation factors are essential [43]. In the screening of nanoemulsion components, solubility studies were performed as a preliminary screening to identify the oil that could effectively solubilize the extract. Among the tested oils, olive oil demonstrated a higher solubilization potential for the extract than did virgin coconut oil. Furthermore, UV-Vis spectroscopy analysis substantiated these findings, displaying higher absorbance values in olive oil (Fig 2).

Sample Information

Analyzed by : Admin  
 Analyzed : 4/17/2025 12:52:21 PM  
 Sample Type : Unknown  
 Level # : 1  
 Sample Name : VA\_SPL  
 Sample ID : VA\_SPL  
 Method File : E:\IACMS-EI\Essential oil\essential oil.qgm  
 Tuning File : C:\GCMSsolution\System\Tune1\Q3\_CID\_On\_28-3-25.qgt

Group #1

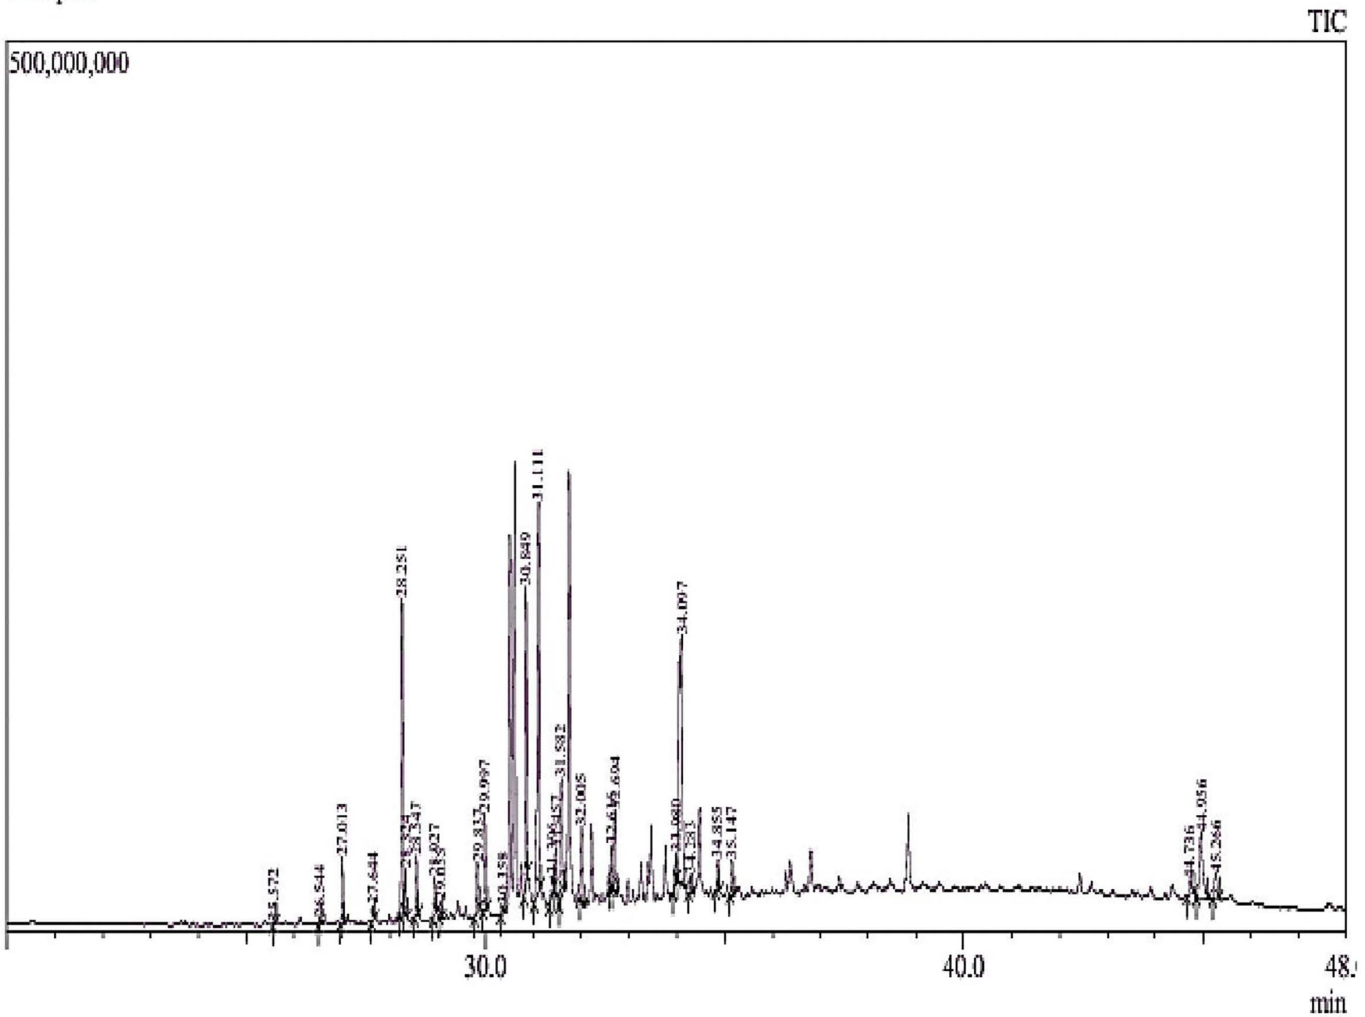

Fig 1. GCMS profile of *Enteromorpha intestinalis* extract.

<https://doi.org/10.1371/journal.pone.0343626.g001>

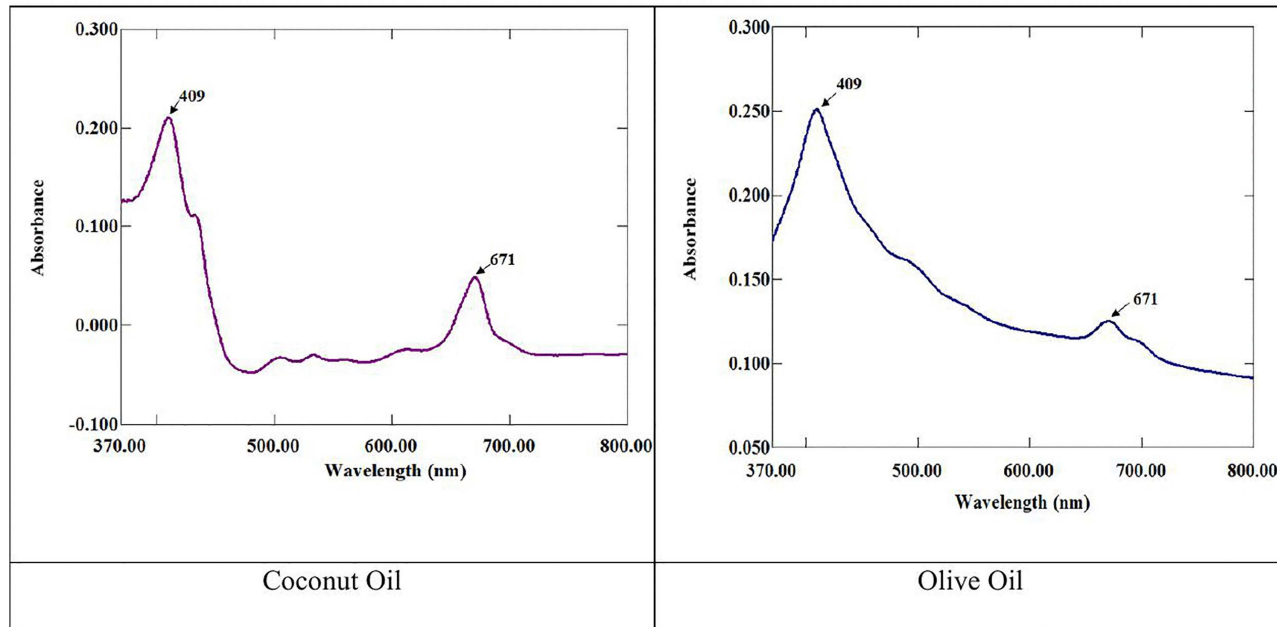

**Fig 2. UV- spectral presentation of *E. intestinalis* extract (0.2%) in coconut and olive oil.**

<https://doi.org/10.1371/journal.pone.0343626.g002>

An earlier study also employed UV-Vis spectrophotometry to characterize their formulation and reported a noticeable increase in absorbance, suggesting enhanced solubilization [20]. The greater solubility of olive oil is ascribed to its rich fatty acid composition, particularly monounsaturated fatty acids, like oleic acid, which have the potential to interact with the phytochemicals present in the extract [15]. Non-ionic surfactants are frequently chosen for nanoemulsion formulations owing to their reduced pH sensitivity, lower critical micelle concentration, and lower toxicity than ionic surfactants [23,44]. Consequently, Tween 80 and PEG 400 were selected as the surfactant and co-surfactant, respectively, owing to their promising physicochemical properties. This combination contributed to the emulsification process, yielding a clear nanoemulsion. A similar combination has been utilized in earlier studies [26,45,46]. PEG 400, Tween 80, and olive oil, employed in the designed formulation, have been successfully used in topical formulations, demonstrating their versatility and effectiveness [17,18].

### Pseudoternary phase diagram

Phase diagrams are an invaluable tool for comprehending the behaviour of nanoemulsions and predicting their stability based on component ratios [47]. Fig 3 shows the phase diagram of olive oil with Smix (Tween 80: PEG 400) and water at ratios of 1:1, 2:1, and 3:1. The colorless area indicates potential emulsions or gel formation, whereas the colored region represents the optimal range for stable nanoemulsion formulation. The phase diagrams indicated that a 1:1 weight ratio of Smix produced the largest nanoemulsion region, making it the preferred choice for nanoemulsion formulation development.

### Nanoemulsion formulations and characterization

The compositions of the nanoemulsion formulations (F1–F7) are outlined in Table 2. Fig 4 showed the visual appearance of the developed formulations, which were evaluated for their physicochemical characterization.

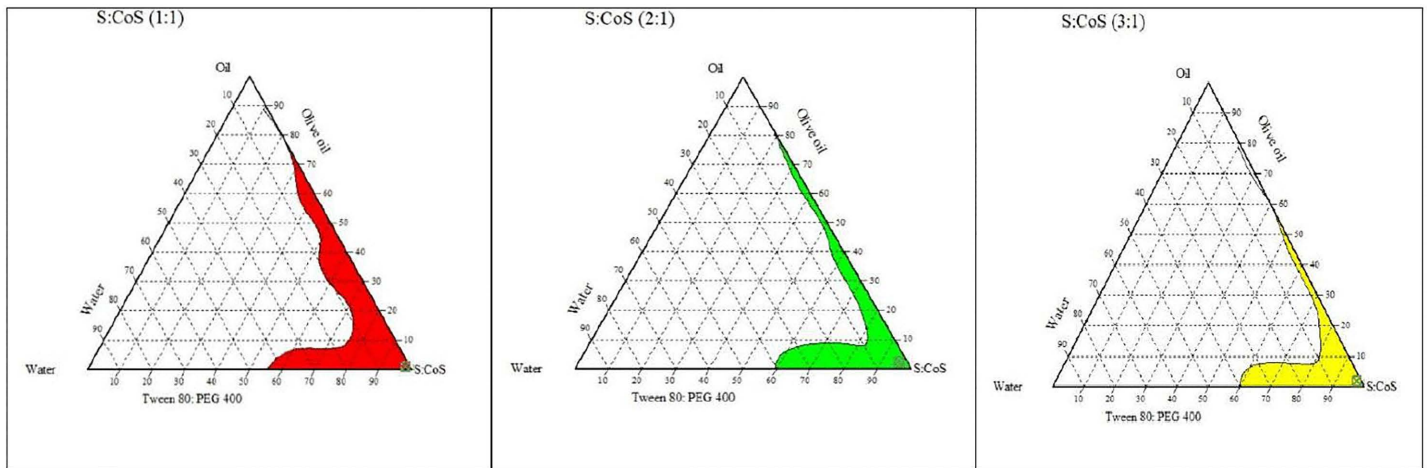

**Fig 3. Pseudoternary phase diagram of olive oil with Smix. (Tween 80: PEG) and water at ratio of 1:1, 2:1, and 3:1.**

<https://doi.org/10.1371/journal.pone.0343626.g003>

**Table 2. Composition and characterization of *E. intestinalis* extract loaded-nanoemulsions computed by simplex lattice design.**

| Formulations | Oil (%) X1 | Smix (%) X2 | Water (%) X3 | Droplet size (nm) (Y1) | PDI (Y2) | Viscosity (m-Pa. S) Y3) | Conductivity (μS/cm) | pH           | R.I           |
|--------------|------------|-------------|--------------|------------------------|----------|-------------------------|----------------------|--------------|---------------|
| F1           | 13.33      | 73.33       | 13.33        | 380 ± 22               | 0.52     | 493.33 ± 3.33           | 12.13 ± 0.19         | 5.80 ± 0.03  | 1.443 ± 0.002 |
| F2           | 15         | 75          | 10           | 390 ± 63               | 0.47     | 476.67 ± 3.33           | 8.43 ± 0.09          | 5.65 ± 0.01  | 1.442 ± 0.003 |
| F3           | 15         | 65          | 20           | 470 ± 65               | 0.68     | 696.66 ± 3.33           | 20.43 ± 0.12         | 5.72 ± 0.01  | 1.441 ± 0.001 |
| F4           | 5          | 75          | 20           | 11.2 ± 12              | 0.27     | 170 ± 5.77              | 21.67 ± 0.09         | 5.68 ± 0.01  | 1.435 ± 0.002 |
| F5           | 13.33      | 68.33       | 18.33        | 344 ± 32               | 0.5      | 526.67 ± 3.33           | 18.67 ± 0.09         | 5.63 ± 0.01  | 1.444 ± 0.001 |
| F6           | 8.33       | 73.33       | 18.33        | 183.27 ± 20            | 0.6      | 290 ± 5.77              | 20.83 ± 0.15         | 5.95 ± 0.003 | 1.439 ± 0.002 |
| F7           | 11.67      | 71.67       | 16.67        | 304 ± 79               | 0.57     | 496.67 ± 3.33           | 18.30 ± 0.25         | 5.60 ± 0.01  | 1.443 ± 0.001 |

Data are expressed as mean ± SE (n = 3).

<https://doi.org/10.1371/journal.pone.0343626.t002>

According to this study, the designed formulations (F1–F7) exhibited droplet sizes ranging from 11.2 ± 1.2 nm to 470 ± 65 nm, with PDI values varying between 0.27 and 0.68, indicating the hydrodynamic size distribution within the nanoemulsion systems. All formulations (F1–F7) displayed droplet sizes within the nanoemulsion range (below 500 nm), as reported by Sungpud et al. [48]. Moreover, several studies have suggested that the droplet size of topical nanoemulsions falls within the range of 20–500 nm. They provide a greater surface area, long-term stability, enhanced drug absorption, and improved bioavailability [6, 15, 49]. The degree of globule size uniformity can also be described by PDI values. Notably, larger globule sizes have greater PDI values and vice versa. Lower PDI values suggest a more monodispersed system, which is preferable for sustained effects and uniform release of bioactive metabolites [17]. Despite the PDI values reaching 0.68, all samples remained visually stable. Moreover, all nanoemulsion formulations (F1–F7) displayed PDI values within the acceptable range (0.05–0.7), as reported by Hernández et al. [50].

pH is an important parameter for the characterization of nanoemulsion formulations. Healthy skin maintains a slightly acidic pH, particularly ranging from 4 to 6. An excessively acidic pH can cause skin irritation, whereas a highly alkaline pH (8–9) may promote microbial growth [51]. The pH of nanoemulsions remained within the range of 5.60 ± 0.01 to 5.95 ± 0.003 (Table 2). The pH value falling within the ideal range further corroborates the acceptability of the formulations for topical application [49, 52].

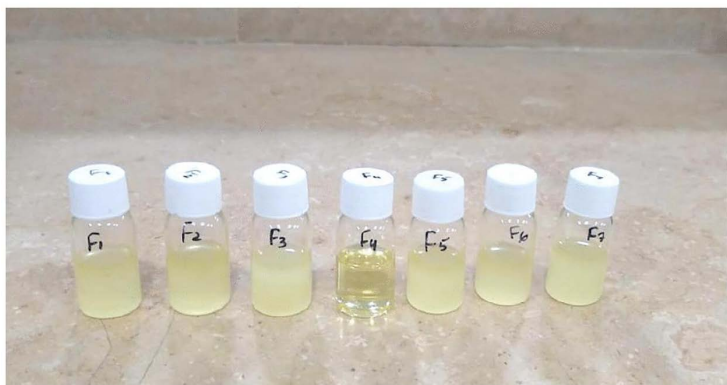

**Fig 4. The visual appearance of nanoemulsion formulations (F1-F7).**

<https://doi.org/10.1371/journal.pone.0343626.g004>

The RI values of all nanoemulsions (F1–F7) presented a characteristic of a clear nanoemulsion [53]. All formulations exhibited refractive indices (RI) in the range of  $1.435 \pm 0.002$  to  $1.444 \pm 0.001$  (Table 2). The refractive indices of all formulations fall right above the refractive index of water (1.33) but below that of olive oil (1.465 to 1.468) and most oils. In this study, the continuous phase was likely water, indicating a direct relation with the RI values, which is also mentioned in the previous studies [54,55]. The refractive index value alone may not be sufficient for accurate classification of nanoemulsions as O/W or W/O types. Several factors, such as the specific oil, surfactants, and co-surfactants used, the concentration of each component and the measurement techniques, can influence the overall RI of the emulsion. Techniques such as conductivity measurements and electron microscopy can also be utilized in conjunction with RI measurements to corroborate the emulsion type.

The conductivity measurements reveal the presence of free ions in a formulation and help identify its type. The type and concentration of surfactant can also influence the conductivity of nanoemulsions. W/O emulsions generally have low conductivity ( $<10 \mu\text{Scm}^{-1}$ ) due to the low conductivity of oil, whereas O/W emulsions have higher conductivity ( $>10 \mu\text{Scm}^{-1}$ ) because of the continuous phase being water [16]. Furthermore, the oil used in the formulation also affects the conductivity [56]. As shown in Table 2, the conductivity values were found to be within the range of  $8.43 \pm 0.09$  to  $21.67 \pm 0.09$ . In this study, all nanoemulsion formulations, except F2, were classified as O/W nanoemulsions based on their refractive index and conductivity values. Whereas F2 was classified as a W/O nanoemulsion. These findings are in accordance with the previous study [16].

Viscosity measurement is another important parameter that influences the flow characteristics, spreadability, and stability of the formulation, which will affect the ease of use. Factors such as temperature, pH, composition, and concentration of surfactant and co-surfactant, water, and oil, as well as manufacturing conditions, can influence the viscosity of nanoemulsion formulations [57,58]. The viscosity of the nanoemulsion formulations (F1–F7) ranged from  $170 \pm 5.77$  to  $696.66 \pm 3.33 \text{ m-Pa}\cdot\text{S}$  (Table 2), showcasing their suitability for topical applications. The results are aligned with the findings of previous studies [30,59].

### Model fitting and optimization

The Design Expert software generated seven formulations (F1 to F7), detailing the with precise quantities of each ingredient outlined in Table 2. The experimental design analysis revealed a significant impact of the independent variables: oil (X1), Smix (X2), and water (X3) on all measured properties, including droplet size (Y1), PDI (Y2), and viscosity (Y3). In this study, the surfactant-to-co-surfactant ratio varied between 65 and 75%, aligning with previous studies that suggested

ratios of approximately 77% [60], and 60% for Tween 80 [24]. Another study also described comparable concentrations of surfactant (77.6–81.8%) and co-surfactant (9.09–11.11%) with olive oil to develop a stable nanoemulsion formulation [61]. To avoid the oily texture of the emulsion, the present study utilized 5–15% (w/w) olive oil, as also described by Hernández et al. [50].

The ANOVA table highlighted the statistical significance of each component of the model. This determines whether the employed model adequately describes the characteristics of the nanoemulsion or not. [57]. According to the present study, the models demonstrated a high correlation with data, with an R<sup>2</sup> value exceeding 0.90 (Table 3). In this study, high R<sup>2</sup> values were achieved, suggesting that the model was highly efficient in fitting the data under experimental conditions. The adjusted R<sup>2</sup> values indicated reasonable agreement between the predicted and experimental values of the model for all measured responses. The difference between adjusted and predicted R<sup>2</sup> values was not more than 0.2, indicating that the model was well-fit to the data [30]. Adequate precision measures the signal-to-noise ratio, a ratio greater than 4, proposing that the model was acceptable for all responses. Table 3 indicates an adequate signal strength for all response variables, and the model can be used to navigate the design space. Additionally, the low Coefficient of Variation (C.V. %) suggests precise measurements, while the PRESS (Predicted Residual Error Sum of Squares) values for PDI, droplet size, and viscosity demonstrated the good predictive capabilities of the model. Moreover, the *p*-values <0.05 corroborate the significance of the model fitting according to ANOVA. The model summary is presented in Table 3.

The ANOVA analysis indicated that oil and Smix concentrations significantly influenced droplet size, with a P-value of 0.0086. An increase in oil content generally led to larger droplets, whereas a higher Smix concentration results in smaller globules, as observed in the F4 formulation (droplet size 11.2 nm). Notably, formulation with the lowest Smix concentration (F3) produced larger droplets (470 ± 65 nm). This may be due to the localization of surfactant molecules at the oil-water interface, which stabilizes the interfacial film and oil droplets. This effect is widely observed in previous studies [22,62,63]. Additionally, the water content also affects the droplet size. Water in combination with surfactant also reduced the droplet size, as previously described [30]. The 3D plot (Fig 5) and the below-mentioned polynomial equation summarized these correlations as follows:

$$\text{Droplet size} = 89.970A + 35.773B + 17.293C - 2.885AB + 6.235AC - 2.0062BC \quad (4)$$

The quadratic model displayed a smaller PDI value with increasing oil content, potentially due to the stabilizing effect of olive oil [63]. The mutual effect of water and Smix presented an antagonistic effect, as F4 exhibited the lowest PDI with a value of 0.27. While increasing one of them (Smix or water proportion) resulted higher PDI. Notably, the F3 formulation, which had the lowest surfactant with high water content, displayed a higher PDI (0.68). This may lead to formulation instability and globule coalescence. The presented data were comparable to the findings of an earlier work [30]. The results showed a significant effect on the response variable, with a *p*-value of 0.035, which substantiates the fitness of this model.

$$\text{PDI} = -0.853977A + 0.120341B + 0.823091C + 0.004814AB + 0.019814AC - 0.016486BC \quad (5)$$

**Table 3. Summary of the model statistics.**

| Variables    | R <sup>2</sup>                        | Adjusted R <sup>2</sup> | Predicted R <sup>2</sup> | Adeq. Precision | Mean    | SD     | Press    | % CV  | P-value |
|--------------|---------------------------------------|-------------------------|--------------------------|-----------------|---------|--------|----------|-------|---------|
| Droplet size | 0.9999                                | 0.9998                  | 0.9892                   | 260.218         | 297.496 | 1.904  | 1531.88  | 0.640 | 0.0086  |
| PDI          | 0.9996                                | 0.9974                  | 0.8151                   | 67.0122         | 0.5164  | 0.0065 | 0.018    | 1.26  | 0.035   |
| Viscosity    | 0.9707                                | 0.956                   | 0.9291                   | 21.9674         | 450     | 35.88  | 12447.78 | 7.97  | 0.0009  |
| Remarks      | Significant interaction of Excipients |                         |                          |                 |         |        |          |       |         |

(SD), Standard deviation; (PDI), Polydispersity index; (PRESS), Predicted residual error sum of squares.

<https://doi.org/10.1371/journal.pone.0343626.t003>

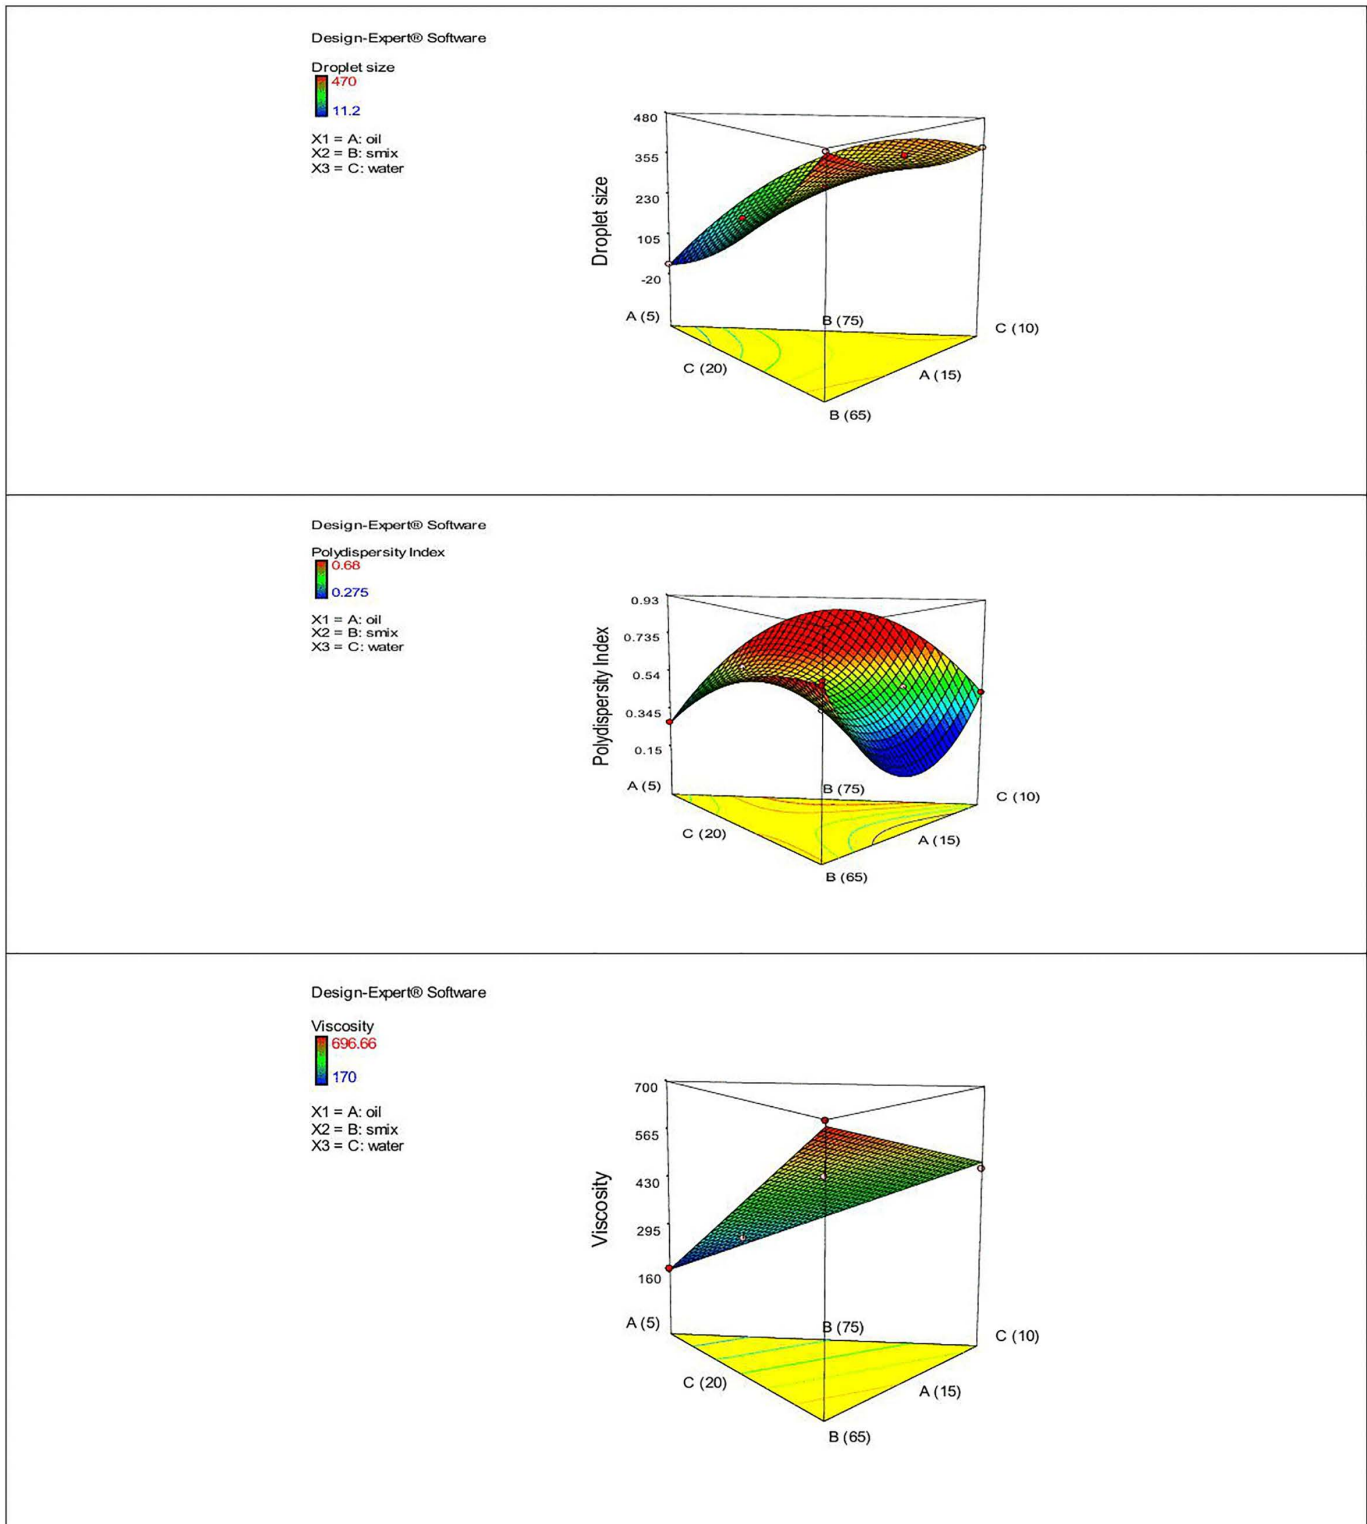

**Fig 5.** 3D surface plots demonstrating the effect of the independent variables; oil (A), Smix (B), and water (C) and dependent variables; globule size (nm), PDI, and Viscosity.

<https://doi.org/10.1371/journal.pone.0343626.g005>

According to equation and the 3D plot (Fig 5), the viscosity exhibited a direct and indirect relation of oil and Smix concentration, as seen in all formulations (F1 to F7). The F4 formulation, which had a lower oil content (5%) and higher Smix content, exhibited low viscosity ( $170 \pm 5.77$  m-Pas. S). While F3 displayed higher viscosity ( $696.66 \pm 3.33$  m-Pas.S) due to its low Smix concentration and increased oil content. F2, despite having the greatest Smix concentration, exhibited higher viscosity ( $476.67 \pm 3.33$  m. Pas-S), which may be due to the higher oil content (Table 2). A higher viscosity might result from the oil, which may hinder the Smix’s capability to emulsify the oil globules effectively. Yousry et al. [30] described a similar trend of the oil effect on viscosity. The results also revealed that a reduced amount of Smix increased the viscosity, as it may raise the interfacial tension between water and oil, producing a more viscous emulsion. The results were consistent with those of a previous study described by Che Marzuki et al. [58]. These findings suggested that the combined effect of oil and Smix content determines the overall viscosity of the formulations. Furthermore, the ANOVA results revealed that the data fit a linear model with a statistically significant p-value (0.0009).

$$\text{Viscosity} = 46.92372A - 4.67548B + 14.25772C \tag{6}$$

Overall, these findings highlighted a significant and predictable interaction between excipients in the formulation as well as provided the conditions for optimizing the nanoemulsion formulations. The positive and negative signs in the aforementioned equations denote the synergistic and antagonistic effects, respectively.

Droplet size is the foremost influencing parameter for the stability of nanoemulsions and the effective transport of active ingredients to the skin [50]. Accordingly, the designed nanoemulsion formulation was optimized considering droplet size as a major parameter along with acceptable PDI and desirable viscosity for topical application. Therefore, among the studied formulations (F1–F7), F6 was chosen as the optimal formulation. Due to its droplet size of  $183.27 \pm 20.04$  nm, which closely aligns with the ideal droplet size range (20–200 nm) and PDI value (0.6), falling within the acceptable range (0.05–0.7) as described previously [18,50]. Although formulation F4 achieved the smallest droplet size and PDI value, it was not selected because it contained the lowest amount of extract and oil and higher surfactant levels, which may accelerate droplet coalescence and rapid destabilization. Furthermore, droplet sizes below 20 nm are prone to being rapidly cleared from the skin surface [39] or can diffuse into the viable epidermis without penetrating the skin [64], thus limiting their therapeutic efficacy. An excessively high viscosity might hinder the formulation process, while a lower viscosity would affect the stability [30]. The chosen formulation (F6) showed optimal viscosity ( $290 \pm 5.77$  m-Pa.S) and was further evaluated for stability and biological investigation.

### Stability studies

The selected nanoemulsion formulation (F6) was stable at  $4 \pm 2$  °C and  $25 \pm 2$  °C throughout the storage period. Any signs of phase separation, creaming, precipitation, or color changes were not recorded, though a slight decrease in pH was noted while being stored at  $25 \pm 2$  °C, but stable at  $4 \pm 2$  °C (Table 4).

**Table 4. Stability studies of nanoemulsion formulation (F6) at different storage temperature.**

| Parameters       | At fresh state |              | After 1 month |              | After 2 month |              | After 3 month |              |
|------------------|----------------|--------------|---------------|--------------|---------------|--------------|---------------|--------------|
|                  | Temperature    |              |               |              |               |              |               |              |
|                  | 4 ± 2 °C       | 25 ± 2 °C    | 4 ± 2 °C      | 25 ± 2 °C    | 4 ± 2 °C      | 25 ± 2 °C    | 4 ± 2 °C      | 25 ± 2 °C    |
| Color            | Y              | Y            | Y             | Y            | Y             | Y            | Y             | Y            |
| Clarity          | C              | C            | C             | C            | C             | C            | C             | C            |
| Texture          | NG             | NG           | NG            | NG           | NG            | NG           | NG            | NG           |
| Phase separation | –              | –            | –             | –            | –             | –            | –             | –            |
| pH               | 5.95 ± 0.003   | 5.95 ± 0.003 | 5.94 ± 0.029  | 6.03 ± 0.024 | 5.92 ± 0.069  | 5.78 ± 0.050 | 5.64 ± 0.085  | 5.49 ± 0.058 |

(Y), Yellow; (C), Clear; (NG), non-greasy; “–” means no phase separation. (pH values: mean ± SEM).

<https://doi.org/10.1371/journal.pone.0343626.t004>

Furthermore, the droplet size varied from 183.27 to  $300.25 \pm 63$  nm, yet it consistently fell within the nanoemulsion range. Interestingly, the PDI value did not increase; instead, a slight decrease was noted, which was likely due to the stabilizing effect of olive oil [63]. The PDI value remained within the acceptable range of 0.40 to 0.60, as noted at 0 (fresh state), 3, 15, and 90 days of storage (Table 5 and Fig 6). The findings of stability studies are consistent with those of previous studies [50,59], suggesting that storage at 4 °C yields optimal results.

### Extract-excipients interaction studies

FT-IR is a powerful analytical tool that is extensively employed to study the potential interactions between the drug and excipients used in the formulation. FT-IR characterization provides detailed information on the specific functional groups in bioactive compounds [17]. The FT-IR spectrum presented in Fig 7A revealed multiple absorption bands, suggesting the occurrence of various functional groups in *E. intestinalis* extract and its corresponding nanoemulsion (F6). The absorption at  $3349.62 \text{ cm}^{-1}$  represents O-H stretching vibrations, suggesting the presence of polysaccharides, flavonoids, and terpenes [65,66]. While the peak  $2916.16 \text{ cm}^{-1}$  is related to the C-H stretching showed alkane. Moreover, the C=O stretching appeared at  $1635.41 \text{ cm}^{-1}$  showed the vibration in proteins or the N-H bond in the primary amine. The absorption at  $1456.49 \text{ cm}^{-1}$  indicates COO-vibration stretching [67], whereas the peak at  $1037.7 \text{ cm}^{-1}$  is associated with C-O stretching, indicating the presence of the flavonoid ring [68]. Notably, the FT-IR spectrum showed similar functional groups in the extract and extract-loaded nanoemulsion (F6), with slight shifts in the peak positions of O-H, C-H, COO, and C-O stretching vibrations towards higher wavelengths (Fig 7B). These findings indicated physisorption, in which the extract molecules stick to the nanoemulsion surface through weak Van der Waals forces, and did not substantially alter the chemical structural integrity of the extract components [65].

### Spreadability

For topical applications, optimal spreadability is essential to achieve the desired effect as well as to enhance user compliance [69]. An excessively high spreadability value can lead to product wash-off, while a low value can hinder proper application [70]. The F6 nanoemulsion showed a good spreadability, with a value of  $34.28 \pm 1.81 \text{ g.cm/s}$ , that demonstrating their suitability for smooth application, comparable to the value reported in an earlier study [71].

### Antioxidant activity

*E. intestinalis* is a substantial source of various bioactive molecules with antioxidant potential. These compounds neutralize free radicals, thereby preventing oxidative damage [12]. Accordingly, this study utilized *E. intestinalis* extract to design a nanoemulsion formulation, and its antioxidant and anti-inflammatory properties were evaluated. The results demonstrated that encapsulating the EI extract within a nanoemulsion formulation significantly ( $p < 0.05$ ) enhanced its antioxidant activity by both methods: DPPH radical scavenging and FRAP assays. DPPH is a simple and reliable method for measuring a molecule's radical scavenging ability, resulting in a distinct color change [72]. The EI extract and nanoemulsion displayed percentage inhibition ranged from  $44.03 \pm 0.03$  to  $50.57 \pm 0.05\%$  and  $48.75 \pm 0.06$  to  $54.32 \pm 0.19\%$ , respectively, at equivalent concentration (50–800  $\mu\text{g/mL}$ ). The  $\text{IC}_{50}$  values for the extract and extract-loaded nanoemulsion were  $660.85 \mu\text{g/mL}$ .

**Table 5. Droplet size and PDI of F6 nanoemulsion formulation at various time intervals.**

| Variables    | Time intervals            |                     |                    |                       |
|--------------|---------------------------|---------------------|--------------------|-----------------------|
|              | 1 <sup>st</sup> day/Fresh | 3 <sup>rd</sup> day | 15 day             | 90 day                |
| Droplet size | 183.27 $\pm$ 20.04        | 191.37 $\pm$ 26.28  | 258.48 $\pm$ 28.25 | 269.9–300.25 $\pm$ 63 |
| PDI          | 0.60                      | 0.57                | 0.40               | 0.52                  |

<https://doi.org/10.1371/journal.pone.0343626.t005>

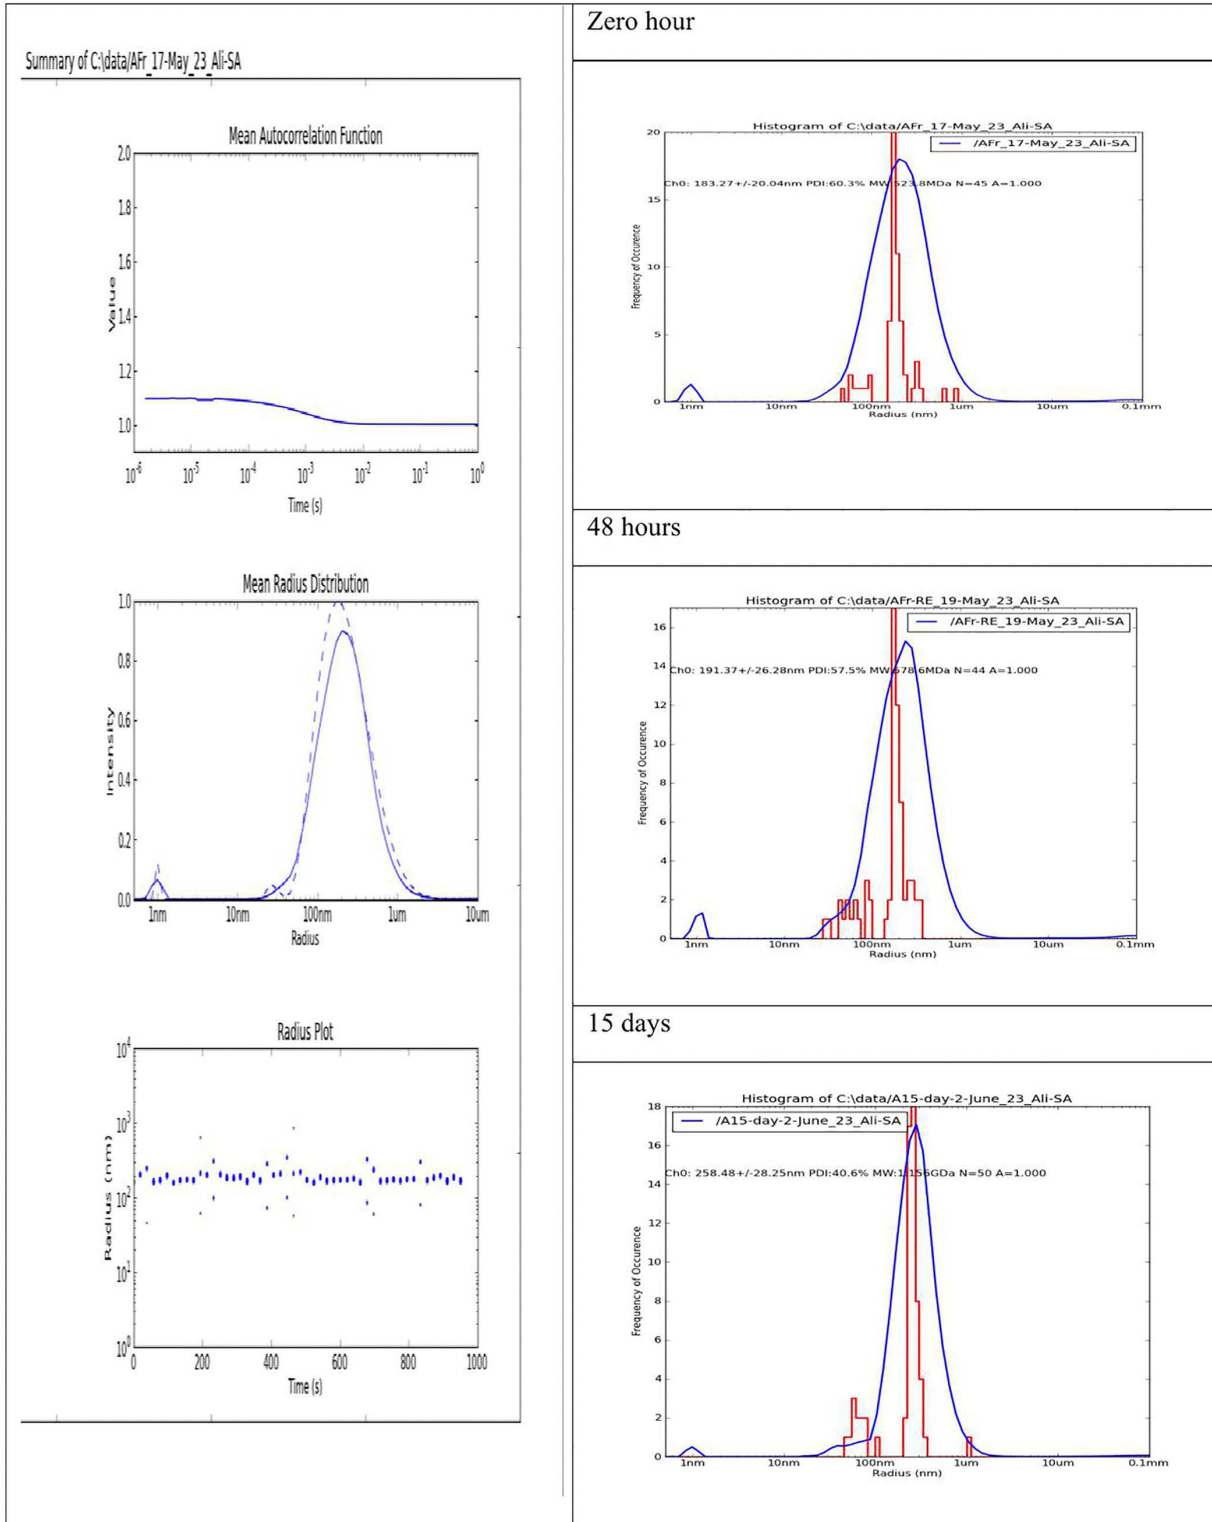

**Fig 6. Measurement of the Droplet size of *E. intestinalis* based-NE at various time intervals.** (Left panel) DLS results of NE illustrating the experimental conditions, i.e., the mean autocorrelation function, monodispersity and radius, respectively. (Right panel) Comparative corresponding droplet size of NF at various time intervals (from top to bottom panel, respectively). All experiments were performed with an auto-piloted run of 50 measurements at every 20s, with a wait time between of 1s (at 25 °C).

<https://doi.org/10.1371/journal.pone.0343626.g006>

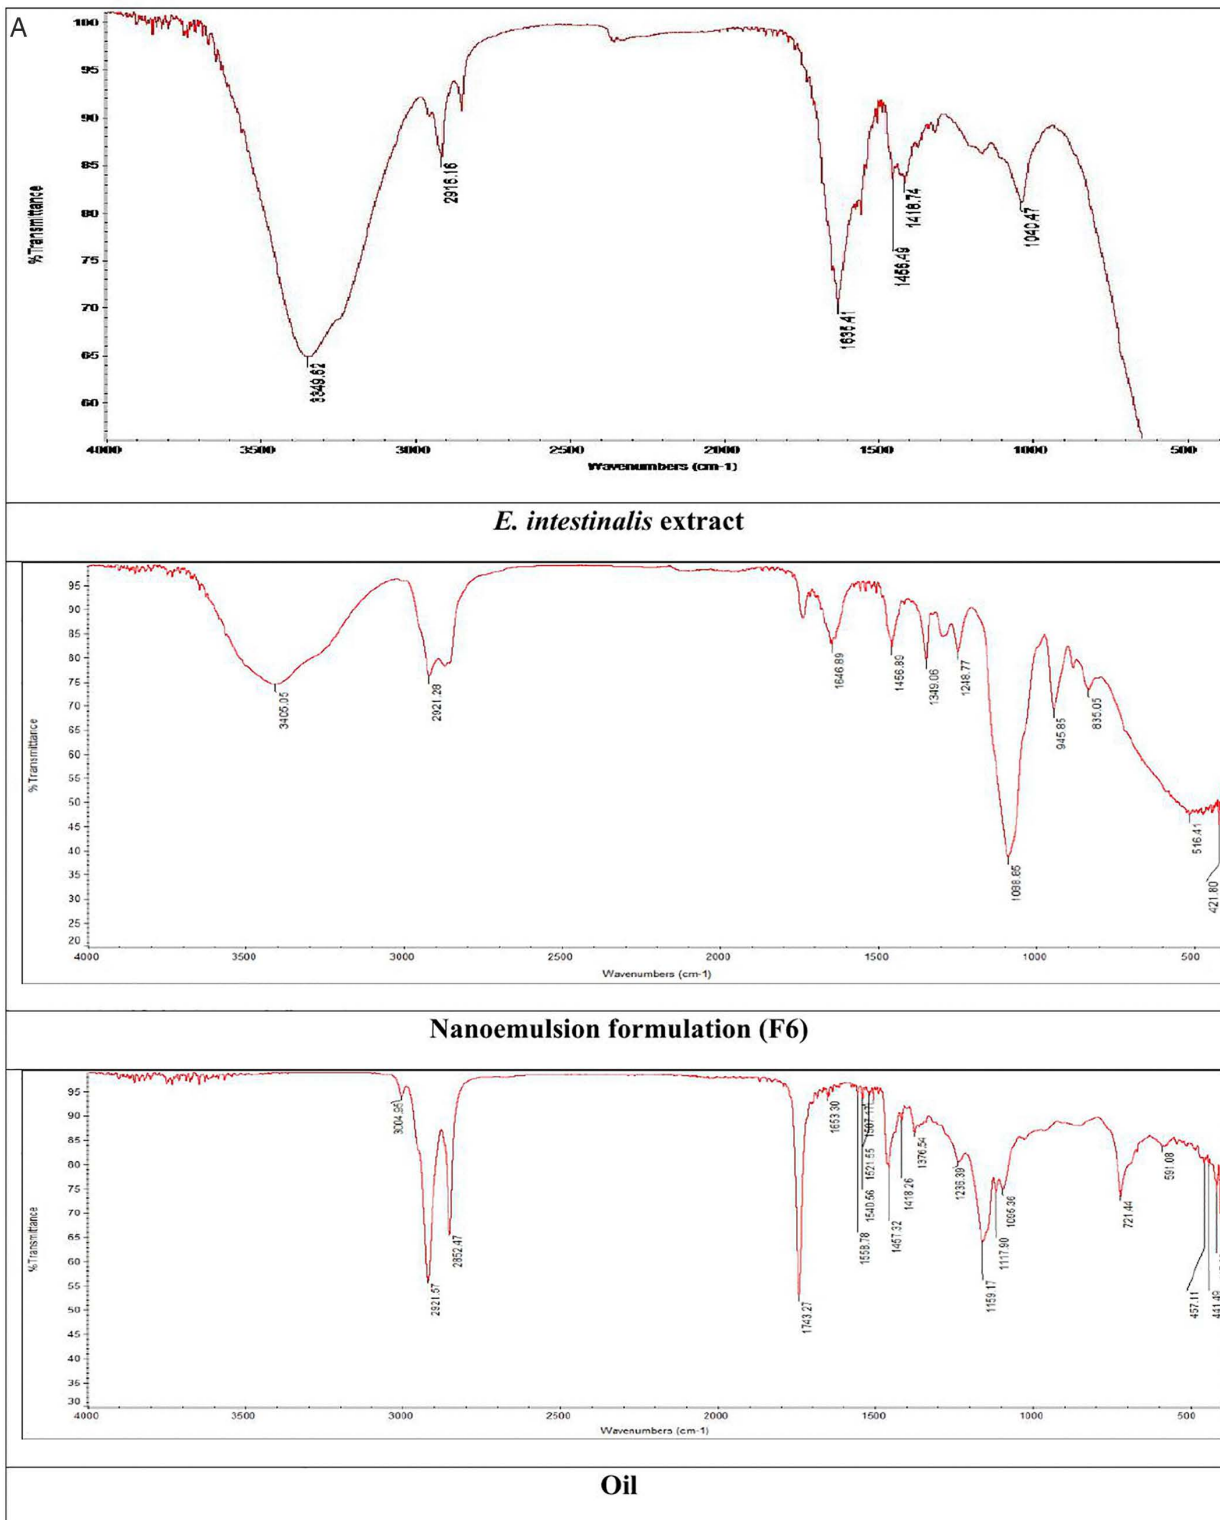

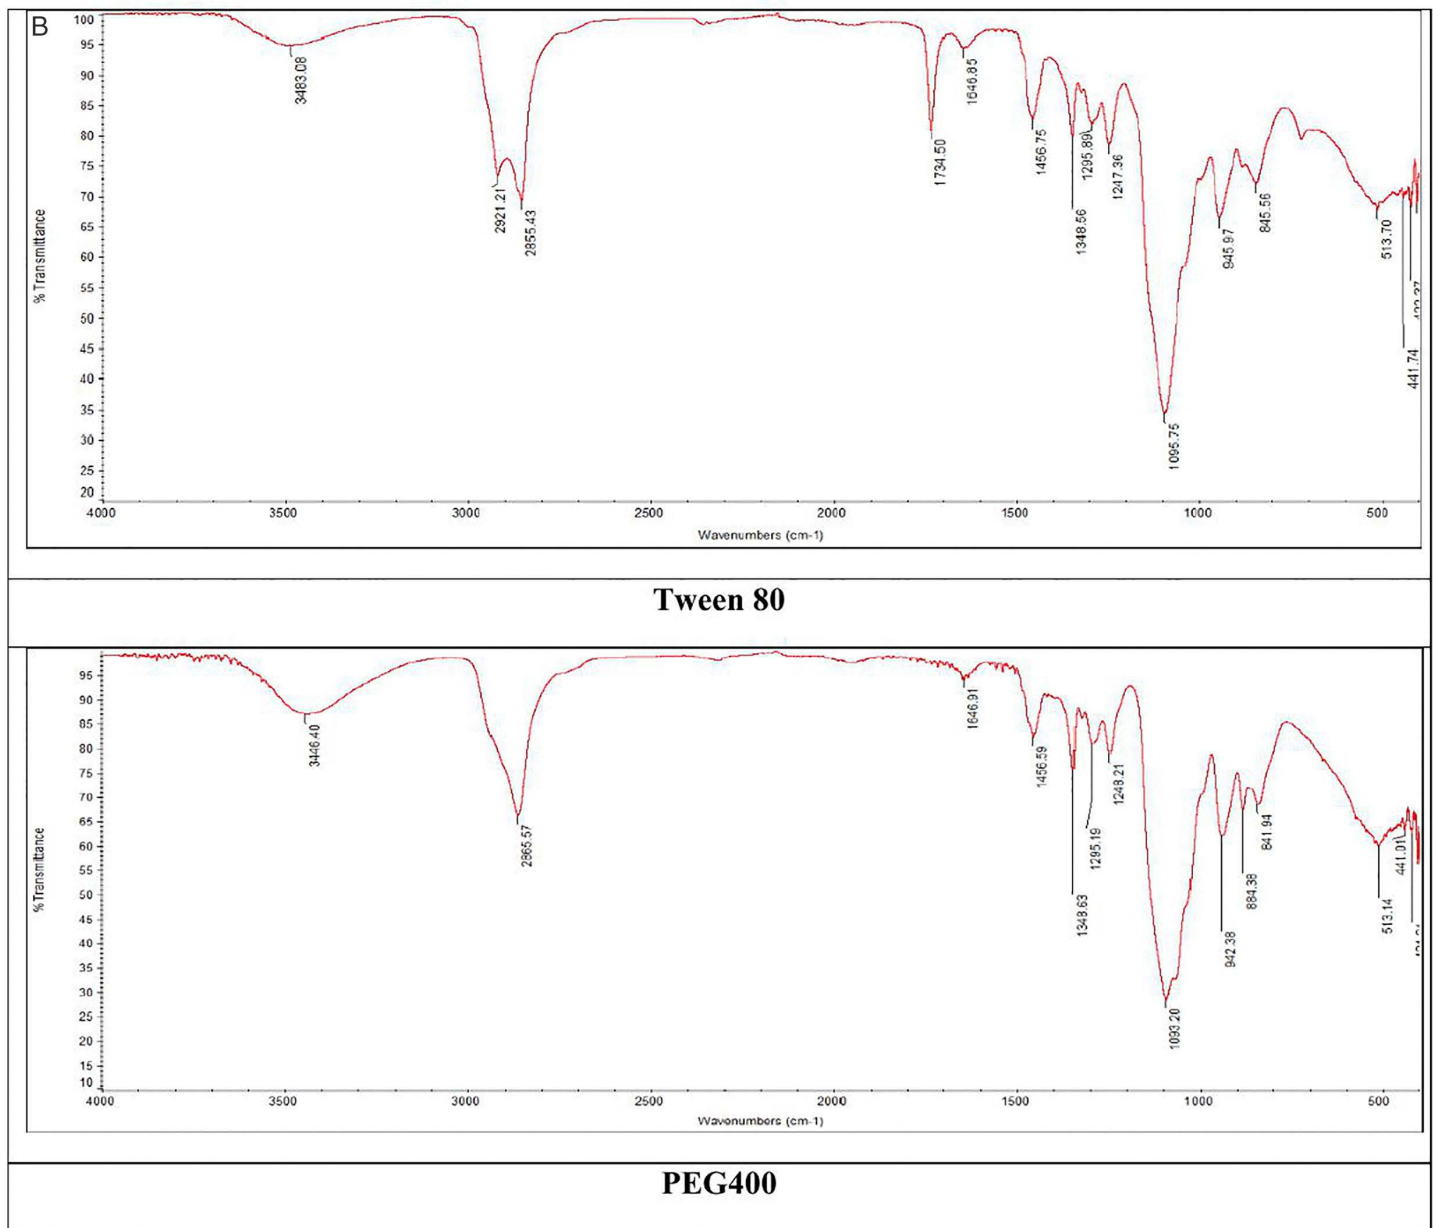

**Fig 7. A.** FTIR spectra from top to down: *E. intestinalis* extract, Nanoemulsion, Olive oil, Tween 80, and PEG 400. **B.** FTIR spectra from top to down: *E. intestinalis* extract, Nanoemulsion, Olive oil, Tween 80, and PEG 400.

<https://doi.org/10.1371/journal.pone.0343626.g007>

and 163.19  $\mu\text{g/mL}$ , respectively. A lower  $\text{IC}_{50}$  value was noted for the nanoemulsion formulation compared to the extract alone. Notably, the  $\text{IC}_{50}$  value of ascorbic acid exhibited the lowest  $\text{IC}_{50}$  value of 4.768  $\mu\text{g/mL}$  (Table 6).

The FRAP assay is based on the reduction of  $\text{Fe}^{+++}$  to  $\text{Fe}^{++}$  ions in a potassium ferricyanide (III) [ $\text{K}_3\text{Fe}(\text{CN})_6$ ] solution, which forms a Prussian blue-colored complex [72,73]. The extract showed a reducing power ranging from  $10.53 \pm 1.22$  to  $51.58 \pm 0.61\%$ , while the extract-based NE displayed  $40.91 \pm 0.09$  to  $88.42 \pm 0.61\%$ , respectively. The results are depicted in Table 6. The reduction observed with the *E. intestinalis* extract was aligned with other species of Enteromorpha, such

**Table 6. Antioxidant activity of *E. intestinalis* extract and F6 nanoemulsion.**

| % Inhibition by DPPH assay |               |                       |                                |               | % Reduction by FRAP assay |                                |               |
|----------------------------|---------------|-----------------------|--------------------------------|---------------|---------------------------|--------------------------------|---------------|
| Concentration (µg/mL)      | Ascorbic acid | Concentration (µg/mL) | <i>E. intestinalis</i> extract | EI-NE         | Concentration (µg/mL)     | <i>E. intestinalis</i> extract | EI-NE         |
| 5                          | 45.41 ± 0.11  | 50                    | 44.03 ± 0.03                   | 48.75 ± 0.06* | 200                       | 10.53 ± 1.22                   | 40.91 ± 0.09* |
| 10                         | 54.22 ± 0.14  | 100                   | 46.86 ± 0.03                   | 49.68 ± 0.07* | 400                       | 16.14 ± 0.93                   | 51.16 ± 0.12* |
| 20                         | 87.01 ± 0.09  | 200                   | 47.08 ± 0.09                   | 50.31 ± 0.06* | 800                       | 32.98 ± 0.35                   | 61.75 ± 0.15* |
| 40                         | 97.44 ± 0.06  | 400                   | 48.73 ± 0.03                   | 52.23 ± 0.06* | 1600                      | 43.51 ± 1.26                   | 71.79 ± 0.95* |
| –                          | –             | 800                   | 50.57 ± 0.05                   | 54.32 ± 0.19* | 3200                      | 51.58 ± 0.61                   | 88.42 ± 0.61* |
| IC <sub>50</sub>           | 4.768 µg/ml   | –                     | 660.85 µg/ml                   | 163.19 µg/ml  | –                         | –                              | –             |

The values represented as means ± SD. \*p < 0.05 using paired t-test.

<https://doi.org/10.1371/journal.pone.0343626.t006>

as *E. compressa* and *E. Prolifera* [34]. Both the extract and algal-based nanoemulsion demonstrated concentration-dependent inhibition and reducing power, with the nanoemulsion displaying superior activity ( $p < 0.05$ ). Pathania et al. and Gomathy et al. [23,74] also stated that the incorporation of nanoparticles and nanoemulsions significantly enhances the antioxidant potential of crude extracts. The metabolites, including phenolics (phenanthrene, cinnamic acid, ellagic acid, and quinic acid) and flavonoids (apigenin, rutin, diosmin, and quercetin), present in the *E. intestinalis* extract are most likely attributed to this enhanced antioxidant activity [12]. Both techniques demonstrated extended antioxidant activity ( $p \leq 0.05$ ) of *E. intestinalis*-based nanoemulsion (F6).

### Paw edema model

The carrageenan-induced paw edema model is extensively employed to assess the efficacy of anti-inflammatory drugs in experimental animals. The *E. intestinalis*-based nanoemulsion (F6) displayed significant anti-inflammatory activity ( $p \leq 0.05$ ), with edema reduction ranging from 8 to 31%, while the standard drug (diclofenac sodium) displayed 12–41% inhibition. The F6 nanoemulsion formulation presented a maximum inhibition of 30%, whereas the standard drug (diclofenac sodium) achieved a maximum inhibition of 40% at 4 h. The results are illustrated in Table 7 and Fig 8. One-way ANOVA followed by Dunnett’s post hoc analysis showed that both the standard drug and algal-based nanoemulsion notably reduced paw edema volume in the early and late phases of inflammation compared to the control group ( $p \leq 0.05$ ), with some effects sustained for up to 4 hours after topical application. These results are aligned with those of previous research [37,75]. Furthermore, *E. intestinalis* has the potential to reduce inflammation due to the presence of bioactive substances, such as phenolics and fatty acids, as identified through GC-MS and FT-IR spectrophotometric analysis. These metabolites are known for their ability to counteract oxidative stress and inflammation, as highlighted in earlier

**Table 7. Anti-inflammatory effect of F6 nanoemulsion on Paw edema.**

| Treatments        | % inhibition of Paw edema volume |                        |                         |                        |                        |                        |
|-------------------|----------------------------------|------------------------|-------------------------|------------------------|------------------------|------------------------|
|                   | 0 min                            | 30 min                 | 1 h                     | 2h                     | 3h                     | 4h                     |
| Control           | 0.76 ± 0.01                      | 1.05 ± 0.02            | 1.62 ± 0.04             | 2.33 ± 0.05            | 3.54 ± 0.03            | 3.75 ± 0.02            |
| EI-NE             | 0.75 ± 0.01                      | 0.96 ± 0.00**<br>(8%)  | 1.36 ± 0.01**<br>(16%)  | 1.79 ± 0.01**<br>(23%) | 2.46 ± 0.02**<br>(31%) | 2.61 ± 0.02**<br>(30%) |
| Diclofenac sodium | 0.77 ± 0.1                       | 0.92 ± 0.01**<br>(12%) | 1.19 ± 0.001**<br>(27%) | 1.56 ± 0.04**<br>(33%) | 2.10 ± 0.03**<br>(41%) | 2.24 ± 0.03**<br>(40%) |

Values are expressed as Mean ± SEM (n=6). \*\*P < 0.05 compared to the control group. Difference between groups were analysed by one-way analysis of variance (ANOVA) followed by Dunnett’s post hoc test.

<https://doi.org/10.1371/journal.pone.0343626.t007>

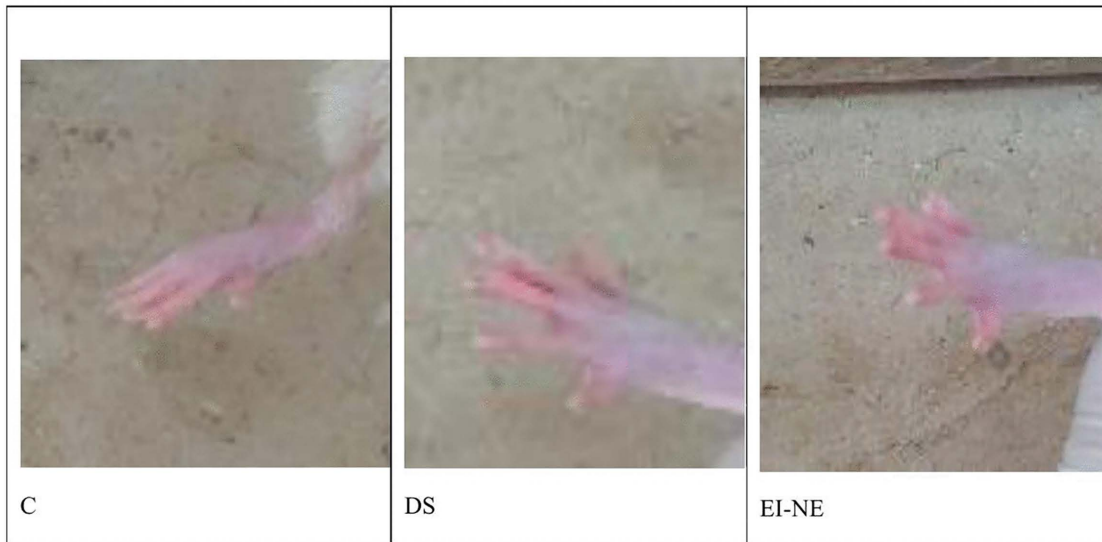

**Fig 8. Anti-inflammatory effect of nanoemulsion formulation F6 on Paw edema (C; Control, DS; Diclofenac sodium, EI-NE; *E. intestinalis* nanoemulsion).**

<https://doi.org/10.1371/journal.pone.0343626.g008>

studies [12,19]. The nanoemulsion formulation serves as an effective carrier for crude extracts by incorporating phytonutrients, including vitamins, antioxidants, and fatty acids, all of which play vital roles in combating oxidative stress and related inflammatory conditions. The inclusion of olive oil in the nanoemulsion further contributed to its inherent anti-inflammatory properties.

According to these findings, the F6 nanoemulsion formulation displayed an anti-inflammatory effect comparable to that of commercially available diclofenac sodium gel. The anti-inflammatory activity results from greater permeability and solubility of bioactive compounds, which are encapsulated within the nanoemulsion system, thereby producing a sustained biological effect. Therefore, it can be used for the management of various inflammatory diseases.

### Acute dermal toxicity

Skin irritation was assessed using the Draize dermal irritation scoring scale, ranging from 0 (no irritation) to 4 (severe irritation) based on redness (erythema) and swelling (edema). Fig 9 illustrates that the EI-NE formulation didn't show any signs of erythema or edema following 24 hours of treatment. The formulation was found to be non-irritating, with a PII score of 0.00. While diclofenac gel induced mild redness in one animal, swelling was not recorded (PII value:  $0.17 \pm 0.1$ ). The results indicate the safety profile of the nanoemulsion formulation.

### Conclusions

This study represents the first documented attempt to develop an *E. intestinalis* extract-based nanoemulsion with antioxidant and anti-inflammatory effects. Among the seven formulations (F1–F7), F6 was designated as the optimal formulation based on the model-predicted optimization criteria, which included an appropriate droplet size within the range of 20–200 nm, acceptable PDI, and optimal viscosity for topical application. The formulation O/W nanoemulsion was clear, non-toxic, stable, and had appropriate spreadability, ensuring optimal skin contact for the desired effects, making it useful for topical applications. Additionally, the antioxidant and anti-inflammatory activities of the formulation show promise for potential applications in both pharmaceuticals and cosmeceuticals. These findings not only validate the effectiveness of

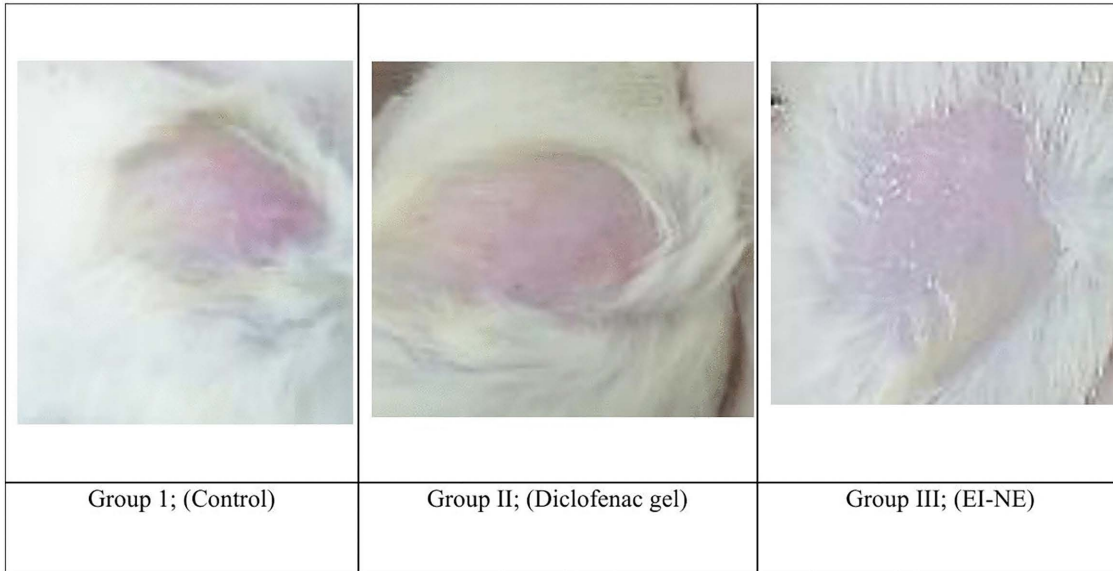

**Fig 9. Acute dermal toxicity assessment on rats' skin.**

<https://doi.org/10.1371/journal.pone.0343626.g009>

the designed nanoemulsion formulation for topical applications but also lay the groundwork for future innovations. This advancement paves the way for further *in vivo* studies to evaluate its efficacy and safety for clinical applications.

## Supporting information

### S1 Table. GC-MS profile of *E. intestinalis* extract.

(XLSX)

### S2 SPSS Data. Scavenging activity of *E. intestinalis* extract and nanoemulsion.

(XLSX)

### S3 SPSS Data. Ferric reducing power assay of *E. intestinalis* extract and nanoemulsion.

(XLSX)

## Author contributions

**Conceptualization:** Shahlla Imam.

**Data curation:** Shumaila Qadir, Fatima Ramzan Ali, Wajiha Iffat.

**Formal analysis:** Shahlla Imam, Rafia Usman.

**Investigation:** Shumaila Qadir.

**Methodology:** Shumaila Qadir, Fatima Ramzan Ali, Shahana Wahid.

**Project administration:** Iqbal Azhar.

**Resources:** Syed Abid Ali, Rabia Ismail Yousuf, Iqbal Azhar.

**Software:** Shumaila Qadir, Fatima Ramzan Ali, Wajiha Iffat.

**Supervision:** Iqbal Azhar.

**Validation:** Syed Abid Ali, Fatima Ramzan Ali, Rafia Usman, Iqbal Azhar.

**Visualization:** Shahlla Imam, Shumaila Qadir.

**Writing – original draft:** Shahlla Imam, Shumaila Qadir.

**Writing – review & editing:** Shahlla Imam.

## References

- Gupta V, Mohapatra S, Mishra H, Farooq U, Kumar K, Ansari MJ, et al. Nanotechnology in Cosmetics and Cosmeceuticals-A Review of Latest Advancements. *Gels*. 2022;8(3):173. <https://doi.org/10.3390/gels8030173> PMID: [35323286](https://pubmed.ncbi.nlm.nih.gov/35323286/)
- Thapa RK, Kim JO. Nanomedicine-based commercial formulations: current developments and future prospects. *J Pharm Investig*. 2023;53(1):19–33. <https://doi.org/10.1007/s40005-022-00607-6> PMID: [36568502](https://pubmed.ncbi.nlm.nih.gov/36568502/)
- Javadi S, Kazemi NM, Halabian R. Preparation of O/W nano-emulsion containing nettle and fenugreek extract and cumin essential oil for evaluating antidiabetic properties. *AAPS Open*. 2021;7(1). <https://doi.org/10.1186/s41120-021-00046-x>
- Rocha-Filho P, Maruno M, Oliveira B, Bernardi D, Gumiero V, Pereira T. Nanoemulsions as a vehicle for drugs and cosmetics. *Nanoscience and Technology*. 2014;1(1):5–17. <http://dx.doi.org/10.15226/2374-8141/1/1/00105>
- Choksi NY, Truax J, Layton A, Matheson J, Mattie D, Varney T, et al. United States regulatory requirements for skin and eye irritation testing. *Cutan Ocul Toxicol*. 2019;38(2):141–55. <https://doi.org/10.1080/15569527.2018.1540494> PMID: [30418044](https://pubmed.ncbi.nlm.nih.gov/30418044/)
- Demisli S, Mitsou E, Pletsa V, Xenakis A, Papadimitriou V. Development and Study of Nanoemulsions and Nanoemulsion-Based Hydrogels for the Encapsulation of Lipophilic Compounds. *Nanomaterials (Basel)*. 2020;10(12):2464. <https://doi.org/10.3390/nano10122464> PMID: [33317080](https://pubmed.ncbi.nlm.nih.gov/33317080/)
- Murphy MJ, Dow AA. Clinical Studies of the Safety and Efficacy of Macroalgae Extracts in Cosmeceuticals. *J Clin Aesthet Dermatol*. 2021;14(10):37–41. PMID: [34976289](https://pubmed.ncbi.nlm.nih.gov/34976289/)
- Jesumani V, Du H, Aslam M, Pei P, Huang N. Potential Use of Seaweed Bioactive Compounds in Skincare-A Review. *Mar Drugs*. 2019;17(12):688. <https://doi.org/10.3390/md17120688> PMID: [31817709](https://pubmed.ncbi.nlm.nih.gov/31817709/)
- López-Hortas L, Flórez-Fernández N, Torres MD, Ferreira-Anta T, Casas MP, Balboa EM, et al. Applying Seaweed Compounds in Cosmetics, Cosmeceuticals and Nutricosmetics. *Mar Drugs*. 2021;19(10):552. <https://doi.org/10.3390/md19100552> PMID: [34677451](https://pubmed.ncbi.nlm.nih.gov/34677451/)
- Morais T, Cotas J, Pacheco D, Pereira L. Seaweeds Compounds: An Ecosustainable Source of Cosmetic Ingredients? *Cosmetics*. 2021;8(1):8. <https://doi.org/10.3390/cosmetics8010008>
- Qari R, Khan E. Diversity of Green Seaweeds along the Coast of Karachi. *International Journal of Marine Science*. 2018. <https://doi.org/10.5376/ijms.2018.08.0022>
- Al-Mur BA. In vitro anticancer, antioxidant and antibacterial activities of crude extract prepared from *Enteromorpha intestinalis* habited in Jeddah, Saudi Arabia. *Saudi J Biol Sci*. 2024;31(7):104026. <https://doi.org/10.1016/j.sjbs.2024.104026> PMID: [38840812](https://pubmed.ncbi.nlm.nih.gov/38840812/)
- Srikong W, Bovornreungroj N, Mittraparparthorn P, Bovornreungroj P. Antibacterial and antioxidant activities of differential solvent extractions from the green seaweed *Ulva intestinalis*. *ScienceAsia*. 2017;43(2):88. <https://doi.org/10.2306/scienceasia1513-1874.2017.43.088>
- Intiaz T, Begum A, Syed Nadeem UI Hasan M, Khan J. Phytochemical evaluation and analysis of *Ulva Intestinalis* using GC-MS technique and its protective effects against ethylene glycol-induced urolithiasis in rats. *Journal Of Population Therapeutics And Clinical Pharmacology*. 2024;31(8):359–67. <https://doi.org/10.53555/jptcp.v31i8.7370>
- Wan Ishak WM, Zulfakar MH. Optimization, development, and safety evaluation of olive oil nanoemulsion for topical application: a response surface methodology. *Asian J Pharm Clin Res*. 2022:167–73. <https://doi.org/10.22159/ajpcr.2022.v15i9.45964>
- Thuraisingam S, Salim N, Azmi IDM, Kartinee N. Development of nanoemulsion containing *Centella asiatica* crude extract as a promising drug delivery system for epilepsy treatment. *Biointerface Research in Applied Chemistry*. 2022;13(1):10–33263. <https://doi.org/10.33263/BRIAC131.017>
- Gul U, Khan MI, Madni A, Sohail MF, Rehman M, Rasul A, Peltonen L. Olive oil and clove oil-based nanoemulsion for topical delivery of terbinafine hydrochloride: *in vitro* and *ex vivo* evaluation. *Drug Delivery*. 2022;29(1):600–12. <https://doi.org/10.1080/10717544.2022.2039805>
- Farahin AW, Yusoff FM, Basri M, Nagao N, Shariff M. Use of microalgae: *Tetraselmis tetraele* extract in formulation of nanoemulsions for cosmeceutical application. *J Appl Phycol*. 2018;31(3):1743–52. <https://doi.org/10.1007/s10811-018-1694-9>
- Pradhan B, Patra S, Behera C, Nayak R, Jit BP, Ragusa A, et al. Preliminary Investigation of the Antioxidant, Anti-Diabetic, and Anti-Inflammatory Activity of *Enteromorpha intestinalis* Extracts. *Molecules*. 2021;26(4):1171. <https://doi.org/10.3390/molecules26041171> PMID: [33671811](https://pubmed.ncbi.nlm.nih.gov/33671811/)
- Sharma P, Tailang M. Design, optimization, and evaluation of hydrogel of primaquine loaded nanoemulsion for malaria therapy. *Futur J Pharm Sci*. 2020;6(1). <https://doi.org/10.1186/s43094-020-00035-z>
- Sah A, Aggarwal G, Jain GK, Zaidi SMA, Naseef PP, Kuruniyan MS, et al. Design and Development of a Topical Nanogel Formulation Comprising of a Unani Medicinal Agent for the Management of Pain. *Gels*. 2023;9(10):794. <https://doi.org/10.3390/gels9100794> PMID: [37888367](https://pubmed.ncbi.nlm.nih.gov/37888367/)
- Nasser N, Hathout RM, Abd-Allah H, Sammour OA. Simplex Lattice Design and Machine Learning Methods for the Optimization of Novel Microemulsion Systems to Enhance p-Coumaric Acid Oral Bioavailability: In Vitro and In Vivo Studies. *AAPS PharmSciTech*. 2024;25(3):56. <https://doi.org/10.1208/s12249-024-02766-1> PMID: [38448576](https://pubmed.ncbi.nlm.nih.gov/38448576/)

23. Pathania R, Najda A, Chawla P, Kaushik R, Khan MA. Low-energy assisted sodium alginate stabilized Phyllanthus niruri extract nanoemulsion: Characterization, in vitro antioxidant and antimicrobial application. *Biotechnol Rep (Amst)*. 2022;33:e00711. <https://doi.org/10.1016/j.btre.2022.e00711> PMID: 35198420
24. Mulleria SS, Marina K, Ghetia SM. Formulation, Optimization and in vitro Evaluation of Apremilast Nanoemulgel for Topical Delivery. *International Journal of Pharmaceutical Investigation*. 2021;11(2):230–7. <https://doi.org/10.5530/ijpi.2021.2.41>
25. Ali FR, Shoaib MH, Ali SA, Yousuf RI, Siddiqui F, Raja R, et al. A nanoemulsion based transdermal delivery of insulin: Formulation development, optimization, in-vitro permeation across Strat-M® membrane and its pharmacokinetic/pharmacodynamic evaluation. *Journal of Drug Delivery Science and Technology*. 2022;71:103338. <https://doi.org/10.1016/j.jddst.2022.103338>
26. Ahmad N, Ahmad R, Al-Qudaihi A, Alaseel SE, Fita IZ, Khalid MS, et al. Preparation of a novel curcumin nanoemulsion by ultrasonication and its comparative effects in wound healing and the treatment of inflammation. *RSC Adv*. 2019;9(35):20192–206. <https://doi.org/10.1039/c9ra03102b> PMID: 35514703
27. Rocha-Filho P, Ferrari M, Maruno M, Souza O, Gumiero V. In Vitro and In Vivo Evaluation of Nanoemulsion Containing Vegetable Extracts. *Cosmetics*. 2017;4(3):32. <https://doi.org/10.3390/cosmetics4030032>
28. Lee SH, Chow PS, Yagnik CK. Developing Eco-Friendly Skin Care Formulations with Microemulsions of Essential Oil. *Cosmetics*. 2022;9(2):30. <https://doi.org/10.3390/cosmetics9020030>
29. Wei X, Dai J, Du Y, Liu L, Li R, Wang Z, et al. Caffeic acid phenethyl ester loaded in a targeted delivery system based on a solid-in-oil-in-water multilayer emulsion: Characterization, stability, and fate of the emulsion during in vivo digestion. *Food Res Int*. 2022;161:111756. <https://doi.org/10.1016/j.foodres.2022.111756> PMID: 36192871
30. Yousry C, Saber MM, Abd-Elsalam WH. A Cosmeceutical Topical Water-in-Oil Nanoemulsion of Natural Bioactives: Design of Experiment, in vitro Characterization, and in vivo Skin Performance Against UVB Irradiation-Induced Skin Damages. *Int J Nanomedicine*. 2022;17:2995–3012. <https://doi.org/10.2147/IJN.S363779> PMID: 35832117
31. Ribeiro RCdA, Barreto SMDAG, Ostrosky EA, da Rocha-Filho PA, Veríssimo LM, Ferrari M. Production and characterization of cosmetic nanoemulsions containing *Opuntia ficus-indica* (L.) mill extract as moisturizing agent. *Molecules*. 2015;20(2):2492–509. <https://doi.org/10.3390/molecules20022492> PMID: 25648593
32. Jaslina NF, Faujan NH, Mohamad R, Ashari SE. In vitro Kinetic Release Study, in vivo Hydration and Moisturizing Effect of Peel-off Oil-in-Water (O/W) Nanoemulsion Containing Kojic Monooleate for Topical Application. *International Journal of Pharmaceutical Investigation*. 2022;12(1):75–81. <https://doi.org/10.5530/ijpi.2022.1.14>
33. Kalyana Sundaram I, Sarangi DD, Sundararajan V, George S, Sheik Mohideen S. Poly herbal formulation with anti-elastase and anti-oxidant properties for skin anti-aging. *BMC Complementary and Alternative Medicine*. 2018;18(1):1–12. <https://doi.org/10.1186/s12906-018-2097-9>
34. Cho M, Lee H-S, Kang I-J, Won M-H, You S. Antioxidant properties of extract and fractions from *Enteromorpha prolifera*, a type of green seaweed. *Food Chem*. 2011;127(3):999–1006. <https://doi.org/10.1016/j.foodchem.2011.01.072> PMID: 25214089
35. Esmaeili F, Zahmatkeshan M, Yousefpoor Y, Alipanah H, Safari E, Osanloo M. Anti-inflammatory and anti-nociceptive effects of Cinnamon and Clove essential oils nanogels: an in vivo study. *BMC Complement Med Ther*. 2022;22(1):143. <https://doi.org/10.1186/s12906-022-03619-9> PMID: 35596157
36. Marwa A, Jufri M. Nanoemulsion curcumin injection showed significant anti-inflammatory activities on carrageenan-induced paw edema in Sprague-Dawley rats. *Heliyon*. 2023;9(4):e15457. <https://doi.org/10.1016/j.heliyon.2023.e15457> PMID: 37151685
37. Md S, Alhakamy NA, Aldawsari HM, Kotta S, Ahmad J, Akhter S, et al. Improved Analgesic and Anti-Inflammatory Effect of Diclofenac Sodium by Topical Nanoemulgel: Formulation Development—In Vitro and In Vivo Studies. *Journal of Chemistry*. 2020;2020:1–10. <https://doi.org/10.1155/2020/4071818>
38. Abo-EL-Sooud K, Ahmed FA, El-Toumy SA, Yaacob HS, ELTantawy HM. Phytochemical, anti-inflammatory, anti-ulcerogenic and hypoglycemic activities of *Periploca angustifolia* L extracts in rats. *Clin Phytosci*. 2018;4(1). <https://doi.org/10.1186/s40816-018-0087-6>
39. Ismaeel ZM, Al-Ani I, Abu Hajleh MN, Al-Dujaili E. Formulation and evaluation of retinyl palmitate and vitamin E nanoemulsion for skin care. *phar*. 2023;70(3):475–83. <https://doi.org/10.3897/pharmacia.70.e98085>
40. Shara M, Yasmin T, Kincaid AE, Limpach AL, Bartz J, Brennehan KA, et al. Safety and toxicological evaluation of a novel niacin-bound chromium (III) complex. *J Inorg Biochem*. 2005;99(11):2161–83. <https://doi.org/10.1016/j.jinorgbio.2005.07.017> PMID: 16169591
41. Honey O, Nihad SAI, Rahman MA, Rahman MM, Islam M, Chowdhury MZR. Exploring the antioxidant and antimicrobial potential of three common seaweeds of Saint Martin's Island of Bangladesh. *Heliyon*. 2024;10(4):e26096. <https://doi.org/10.1016/j.heliyon.2024.e26096> PMID: 38404817
42. Choosuwan P, Praiboon J, Boonpisuttinant K, Klomjit A, Muangmai N, Ruangchuay R, et al. Inhibitory Effects of *Caulerpa racemosa*, *Ulva intestinalis*, and *Lobophora challengeriae* on Tyrosinase Activity and  $\alpha$ -MSH-Induced Melanogenesis in B16F10 Melanoma Cells. *Life (Basel)*. 2023;13(4):934. <https://doi.org/10.3390/life13040934> PMID: 37109464
43. Safaya M, Rotliwala YC. Nanoemulsions: A review on low energy formulation methods, characterization, applications and optimization technique. *Materials Today: Proceedings*. 2020;27:454–9. <https://doi.org/10.1016/j.matpr.2019.11.267>
44. Yousry C, Zikry PM, Basalious EB, El-Gazayerly ON. Self-nanoemulsifying System Optimization for Higher Terconazole Solubilization and Non-Irritant Ocular Administration. *Adv Pharm Bull*. 2020;10(3):389–98. <https://doi.org/10.34172/apb.2020.047> PMID: 32665897

45. Mutmainah NAK, Hertiani TA. *Moringa oleifera* seed oil nanoemulsion using Tween 80 and Polyethylene glycol 400: Oil Characterization and formula optimization. *Trop J Nat Prod Res.* 2025;9(4):1843–52 <https://doi.org/10.26538/tjnpr/v9i4.59>
46. Sultan MH. Lemon oil nano emulsion new formulation for topical application and in vitro evaluation for biological activity. *Farmacia.* 2024;72(5):1068–76. <https://doi.org/10.31925/farmacia.2024.5.9>
47. Artiga-Artigas M, Guerra-Rosas MI, Morales-Castro J, Salvia-Trujillo L, Martín-Belloso O. Influence of essential oils and pectin on nanoemulsion formulation: A ternary phase experimental approach. *Food Hydrocolloids.* 2018;81:209–19. <https://doi.org/10.1016/j.foodhyd.2018.03.001>
48. Sungpud C, Panpipat W, Chaijan M, Sae Yoon A. Techno-biofunctionality of mangostin extract-loaded virgin coconut oil nanoemulsion and nanoemulgel. *PLoS One.* 2020;15(1):e0227979. <https://doi.org/10.1371/journal.pone.0227979> PMID: 31995599
49. Arianto A, Lie DY, - S, Bangun HB. Preparation and Evaluation of Nanoemulgels Containing a Combination of Grape Seed Oil and Anisotriazine as Sunscreen. *Open Access Maced J Med Sci.* 2020;8(B):994–9. <https://doi.org/10.3889/oamjms.2020.5293>
50. Hernández AR, Sepulveda L, Hata Y, Castellanos L, Björklund S, Ruzgas T, et al. Algae extract-based nanoemulsions for photoprotection against UVB radiation: an electrical impedance spectroscopy study. *Scientific Reports.* 2025;15(1):1911. <https://doi.org/10.1038/s41598-025-85604-z>
51. Dinshaw IJ, Ahmad N, Salim N, Leo BF. Nanoemulsions: A Review on the Conceptualization of Treatment for Psoriasis Using a “Green” Surfactant with Low-Energy Emulsification Method. *Pharmaceutics.* 2021;13(7):1024. <https://doi.org/10.3390/pharmaceutics13071024> PMID: 34371716
52. Gokhale JP, Mahajan HS, Surana SJ. Quercetin loaded nanoemulsion-based gel for rheumatoid arthritis: In vivo and in vitro studies. *Biomed Pharmacother.* 2019;112:108622. <https://doi.org/10.1016/j.biopha.2019.108622> PMID: 30797146
53. Moghimipour E, Salimi A, Eftekhari S. Design and characterization of microemulsion systems for naproxen. *Adv Pharm Bull.* 2013;3(1):63–71. <https://doi.org/10.5681/apb.2013.011> PMID: 24312814
54. Farooq U, Rasool A, Zafarullah M, Abbas G, Rasool M, Ali F, et al. Nanoemulsions as novel nanocarriers for drug delivery across the skin: In-vitro, in-vivo evaluation of miconazole nanoemulsions for treatment of Candidiasis albicans. *Des Monomers Polym.* 2021;24(1):240–58. <https://doi.org/10.1080/15685551.2021.1965724> PMID: 34434070
55. Kotta S, Khan AW, Ansari SH, Sharma RK, Ali J. Formulation of nanoemulsion: a comparison between phase inversion composition method and high-pressure homogenization method. *Drug Deliv.* 2015;22(4):455–66. <https://doi.org/10.3109/10717544.2013.866992> PMID: 24329559
56. Silva CC, Benati RB, Massaro TNC, Pereira KC, Gaspar LR, Marcato PD. Antioxidant and anti-tyrosinase activities of quercetin-loaded olive oil nanoemulsion as potential formulation for skin hyperpigmentation. *Journal of Dispersion Science and Technology.* 2022;44(14):2628–38. <https://doi.org/10.1080/01932691.2022.2116715>
57. Ananingsih VK, Pratiwi AR, Soedarini B, Putra YAS. Formulation of nanoemulsion parijoto fruit extract (*Medinilla Speciosa*) with variation of tweens stabilizers. *Front Nutr.* 2024;11:1398809. <https://doi.org/10.3389/fnut.2024.1398809> PMID: 39040928
58. Che Marzuki NH, Wahab RA, Abdul Hamid M. An overview of nanoemulsion: concepts of development and cosmeceutical applications. *Biotechnology & Biotechnological Equipment.* 2019;33(1):779–97. <https://doi.org/10.1080/13102818.2019.1620124>
59. Tungadi R, Wicita P. Formulation, optimization, and characterization of snakehead fish (*Ophiocephalus Striatus*) powder nanoemulgel. *Braz J Pharm Sci.* 2020;56. <https://doi.org/10.1590/s2175-97902019000417337>
60. Indrayani AW, Artini IGA, Widhiarthini IAA, Tianing NW, Jawi IM. The potential of sunscreen preparation containing ethanol extract of *Moringa oleifera* leaves in nanoemulgel formulation. *Bali Med J.* 2020;9(3):893–903. <https://doi.org/10.15562/bmj.v9i3.2081>
61. Ermawati DE, Yugatama A, Wulandari W. Optimization of olive oil, tween 80, and propylene glycol of selfnanoemulsifying drug delivery system of zinc oxide by d-optimal method. *J Pharm Sci Community.* 2020;17(2):92–101. <https://doi.org/10.24071/jpsc.001649>
62. Algahtani MS, Ahmad MZ, Ahmad J. Investigation of Factors Influencing Formation of Nanoemulsion by Spontaneous Emulsification: Impact on Droplet Size, Polydispersity Index, and Stability. *Bioengineering (Basel).* 2022;9(8):384. <https://doi.org/10.3390/bioengineering9080384> PMID: 36004909
63. Ren J-N, Dong M, Hou Y-Y, Fan G, Pan S-Y. Effect of olive oil on the preparation of nanoemulsions and its effect on aroma release. *J Food Sci Technol.* 2018;55(10):4223–31. <https://doi.org/10.1007/s13197-018-3358-9> PMID: 30228421
64. Somwongin S, Chaiyana W. Clinical Efficacy in Skin Hydration and Reducing Wrinkles of Nanoemulsions Containing *Macadamia integrifolia* Seed Oil. *Nanomaterials (Basel).* 2024;14(8):724. <https://doi.org/10.3390/nano14080724> PMID: 38668218
65. Tsi Ndeh N, Maensiri S, Maensiri D. The effect of green synthesized gold nanoparticles on rice germination and roots. *Adv Nat Sci: Nanosci Nanotechnol.* 2017;8(3):035008. <https://doi.org/10.1088/2043-6254/aa724a>
66. Jebamalar J, Sumathy V. A comparative analysis of the anticoagulant property of *Chaetomorpha antennina* and *Ceratophyllum submersum*. *Journal of Biotechnology and Biochemistry.* 2018;4(5):06–14. <https://doi.org/10.9790/264X-0405020614>
67. El-Naggar NE-A, Hamouda RA, Abuelmagd MA, Abdelgalil SA. Bioprocess development for biosorption of cobalt ions and Congo red from aquatic mixture using *Enteromorpha intestinalis* biomass as sustainable biosorbent. *Sci Rep.* 2021;11(1):14953. <https://doi.org/10.1038/s41598-021-94026-6> PMID: 34294748
68. Krysa M, Szymańska-Chargot M, Zdunek A. FT-IR and FT-Raman fingerprints of flavonoids—A review. *Food Chemistry.* 2022;393:133430. <https://doi.org/10.1016/j.foodchem.2022.133430>
69. Latif MS, Nawaz A, Asmari M, Uddin J, Ullah H, Ahmad S. Formulation Development and In Vitro/In Vivo Characterization of Methotrexate-Loaded Nanoemulsion Gel Formulations for Enhanced Topical Delivery. *Gels.* 2022;9(1):3. <https://doi.org/10.3390/gels9010003> PMID: 36661771

70. Ting TC, Amat Rahim NF, Che Zaudin NA, Abdullah NH, Mohamad M, Shoparwe NF, et al. Development and Characterization of Nanoemulgel Containing Piper betle Essential Oil as Active Ingredient. IOP Conf Ser: Earth Environ Sci. 2020;596(1):012032. <https://doi.org/10.1088/1755-1315/596/1/012032>
71. Bhura MRG, Bhagat KA, Shah SK. Formulation and evaluation of topical nano emulgel of adapalene. World J Pharm Sci. 2015;3(4):1013–24.
72. Mechqoq H, Hourfane S, Yaagoubi ME, Hamdaoui AE, Msanda F, Almeida JRG da S, et al. Phytochemical Screening, and In Vitro Evaluation of the Antioxidant and Dermocosmetic Activities of Four Moroccan Plants: Halimium antiatlanticum, Adenocarpus artemisiifolius, Pistacia lentiscus and Leonotis nepetifolia. Cosmetics. 2022;9(5):94. <https://doi.org/10.3390/cosmetics9050094>
73. Jayanthi P, Lalitha P. Reducing power of the solvent extracts of Eichhornia crassipes (Mart.) Solms. International Journal of Pharmacy and Pharmaceutical Sciences. 2011;3(3):126–8.
74. Gomathy J, L J., J. J., Ragnathan M. An *in vitro* study on the antimicrobial activity and antioxidant activities of the extract of a seaweed, *Enteromorpha intestinalis* against certain pathogens. Research Square; 2021. <https://doi.org/10.21203/rs.3.rs-1116593/v1>
75. Rajamani S, Sengodan T, Thangavelu S, Shanmukhan NK, Radhakrishnan A. Naringenin-Loaded TPGS Polymeric Nanosuspension: In-Vitro and In-Vivo Anti-Inflammatory Activity. Indonesian J Pharm. 2019;30(3):225. <https://doi.org/10.14499/indonesianjpharm30iss3pp225>
